# Supplementary material for: Capsaicin ameliorates diet-induced disturbances of glucose homeostasis and gut microbiota in mice associated with the circadian clock
Source: Royal Society of Chemistry journal article supplement (doi:10.1039/d2fo03523e), 2023-01-01
Supplement: d2fo03523e1.pdf [file d2fo03523e1.pdf]

|       | Weeks | Bodyweight |       |       |       |       |       |       |       |       |       |
|-------|-------|------------|-------|-------|-------|-------|-------|-------|-------|-------|-------|
|       |       | 0          | 1     | 2     | 3     | 4     | 5     | 6     | 7     | 8     | 9     |
| ND1   | 20.76 | 26.04      | 25.58 | 26.17 | 26.94 | 27.29 | 27.53 | 28.64 | 27.33 | 28.42 | 28.45 |
| ND2   | 21.11 | 23.89      | 23.45 | 23.94 | 23.2  | 23.6  | 24.95 | 25.81 | 24.51 | 26.39 | 26.06 |
| ND3   | 23.1  | 26.47      | 26.52 | 26.67 | 26.15 | 27.19 | 27.87 | 28    | 28.02 | 30.16 | 28.87 |
| ND4   | 19.2  | 21.59      | 22.05 | 23.13 | 24.16 | 24.68 | 24.9  | 25.29 | 25    | 25.47 | 26.91 |
| ND5   | 20.69 | 22.25      | 22.66 | 23.98 | 24.82 | 25.53 | 25.32 | 25.86 | 26.27 | 25.4  | 27.2  |
| ND6   | 20.91 | 24.3       | 24.54 | 25.76 | 25.66 | 26.35 | 27.01 | 27.29 | 27.9  | 28.66 | 29.63 |
| ND7   | 21.39 | 23.72      | 24.04 | 25.15 | 25.15 | 25.69 | 26.93 | 26.67 | 26.37 | 27.76 | 27.83 |
| ND8   | 19.28 | 21.45      | 22.53 | 22.18 | 23.28 | 24.26 | 25    | 25.95 | 26.07 | 26.25 | 26.68 |
| ND9   | 21.68 | 24.64      | 25.8  | 26.2  | 27.16 | 27.45 | 27.46 | 27.9  | 28.26 | 29.08 | 29.36 |
| ND10  | 21    | 23.27      | 25.74 | 24.78 | 25.45 | 26.15 | 26.71 | 27.08 | 27.79 | 28.2  | 29    |
| ND11  | 20.89 | 23.87      | 24.49 | 24.89 | 25.84 | 26.79 | 26.8  | 27.19 | 27.21 | 28.58 | 28.05 |
| ND12  | 20.71 | 23.86      | 24.69 | 25.5  | 25.94 | 25.82 | 26.27 | 26.47 | 27    | 27.87 | 28.36 |
| ND13  | 19.4  | 22.89      | 23.5  | 23.83 | 25.44 | 25.94 | 25.93 | 26.85 | 26.68 | 27.98 | 29.16 |
| ND14  | 20.35 | 25         | 25.29 | 25.95 | 26.98 | 27.86 | 27.88 | 28.56 | 28.2  | 29.63 | 30.18 |
| ND15  | 19.62 | 23.48      | 24    | 24.44 | 24.9  | 25.65 | 25.75 | 26.58 | 27.3  | 29.01 | 28.62 |
| ND16  | 18.25 | 22.37      | 23.19 | 23.03 | 23.54 | 23.78 | 24.27 | 24.78 | 24.77 | 24.61 | 25.58 |
| ND17  | 22.3  | 24.9       | 26.93 | 26.79 | 27.02 | 27.51 | 27.6  | 28.34 | 28.63 | 29.13 | 29.81 |
| ND18  | 20.49 | 23.05      | 23.7  | 24.03 | 26.15 | 26.04 | 26.5  | 26.81 | 27.22 | 27.16 | 28.29 |
| ND19  | 21.09 | 23.23      | 24.63 | 25    | 26.74 | 27.13 | 27.5  | 28.27 | 28.59 | 29.15 | 29.72 |
| ND20  | 19.5  | 22.02      | 22.58 | 23    | 23.68 | 24.52 | 24.62 | 25.25 | 25.88 | 26.22 | 27.19 |
| ND21  | 22.12 | 25.42      | 25.61 | 26    | 27.46 | 27.76 | 28.29 | 28.48 | 28.15 | 29.13 | 29.4  |
| ND22  | 20.82 | 22.4       | 23.03 | 24.06 | 24.29 | 24.27 | 25.26 | 26.18 | 25.7  | 26.33 | 26.79 |
| ND23  | 20.7  | 24.41      | 24.29 | 25.31 | 25.4  | 25.81 | 26.68 | 27.42 | 27.14 | 27.85 | 28.51 |
| ND24  | 20.56 | 24.24      | 27.02 | 28.75 | 28.44 | 28.84 | 29.26 | 29.73 | 29.38 | 29.81 | 29.83 |
| HFFD1 | 18.65 | 24.51      | 28.48 | 26.72 | 27.69 | 28.72 | 29.64 | 30.25 | 30.09 | 31.8  | 33.01 |
| HFFD2 | 19.4  | 23.97      | 25.91 | 26.46 | 27.13 | 28.28 | 29.06 | 29.33 | 30.6  | 29.77 | 31    |
| HFFD3 | 19.41 | 23.55      | 26.17 | 27.25 | 28.27 | 29.18 | 29.96 | 30.28 | 30.5  | 31.86 | 32.49 |
| HFFD4 | 20.93 | 24.55      | 26.58 | 26.84 | 28.28 | 29.33 | 29.34 | 30.03 | 29.55 | 31.4  | 32.42 |
| HFFD5 | 19.12 | 24.5       | 25.43 | 26.36 | 27.36 | 28.38 | 29.29 | 29.87 | 30.17 | 31.85 | 31.3  |
| HFFD6 | 18.84 | 21.24      | 23.77 | 24.53 | 25.54 | 26.27 | 27.37 | 27.77 | 30.65 | 30    | 30.66 |
| HFFD7 | 21.47 | 25.1       | 27.77 | 28.66 | 29.53 | 31    | 31.75 | 30.72 | 30.86 | 33.07 | 34.26 |

|      |        |       |       |       |       |       |       |       |       |       |       |       |       |
|------|--------|-------|-------|-------|-------|-------|-------|-------|-------|-------|-------|-------|-------|
| HFFD | HFFD8  | 19.52 | 23.89 | 25.34 | 25.84 | 26.47 | 27.89 | 28.42 | 28.71 | 31    | 30.33 | 30    |       |
|      | HFFD9  | 19.74 | 22.09 | 23.67 | 25.34 | 26.62 | 27    | 27.85 | 28.47 | 30.12 | 30.06 | 31.07 |       |
|      | HFFD10 | 23.96 | 26.19 | 27.68 | 29.06 | 29.72 | 30.36 | 31.77 | 32.08 | 32.72 | 34.61 | 33.66 |       |
|      | HFFD11 | 20.76 | 23.69 | 24.48 | 26.41 | 27.1  | 28.26 | 30.11 | 29.86 | 29.83 | 30.08 | 31.55 |       |
|      | HFFD12 | 21.22 | 25.24 | 28.31 | 28.52 | 29.2  | 30.66 | 32.17 | 31.14 | 31.3  | 33    | 33.27 |       |
|      | HFFD13 | 18.61 | 22.43 | 24.46 | 24.94 | 26.17 | 27.67 | 29.1  | 29.31 | 30.55 | 31.42 | 31.22 |       |
|      | HFFD14 | 19.9  | 23.5  | 26.17 | 26.85 | 28.07 | 28.8  | 30    | 29.64 | 29.91 | 31.76 | 32.41 |       |
|      | HFFD15 | 18.58 | 23.11 | 25.66 | 27.2  | 28.26 | 29.73 | 31.31 | 31    | 32.29 | 33.46 | 33.79 |       |
|      | HFFD16 | 21.57 | 25.21 | 27.62 | 28.13 | 28.94 | 29.76 | 31.45 | 30.2  | 30.63 | 31.74 | 33.14 |       |
|      | HFFD17 | 21.36 | 24.66 | 26.98 | 27.4  | 28.03 | 29.1  | 30.25 | 30.3  | 29.81 | 30.78 | 31.87 |       |
|      | HFFD18 | 20.3  | 23.04 | 25.6  | 26.3  | 27.64 | 28.9  | 31.28 | 30.17 | 30.1  | 31.37 | 31.88 |       |
|      | HFFD19 | 20.7  | 23.75 | 25.83 | 27.39 | 28.42 | 29.64 | 30.15 | 29.97 | 29.49 | 31.36 | 32.11 |       |
|      | HFFD20 | 22    | 24.07 | 27.2  | 28.05 | 29.33 | 30.64 | 32.94 | 32    | 32.98 | 35.5  | 35.1  |       |
|      | HFFD21 | 18.53 | 22.83 | 25.76 | 26.23 | 27.64 | 27.86 | 29.35 | 30.09 | 29.62 | 31.73 | 31.6  |       |
|      | HFFD22 | 20.34 | 23.54 | 26.74 | 27.74 | 28.64 | 29.64 | 31.3  | 30.81 | 31    | 32.79 | 33.89 |       |
|      | HFFD23 | 22.06 | 24.95 | 27.35 | 28.13 | 29.43 | 29.44 | 30.73 | 30.07 | 30.56 | 33    | 33.87 |       |
|      | HFFD24 | 21.25 | 24.93 | 26.66 | 28.03 | 28.34 | 28.95 | 30.8  | 30.8  | 30.1  | 32.45 | 34.05 |       |
|      | WM     | WM1   | 18.26 | 24.36 | 25.67 | 26.55 | 26.63 | 27.13 | 28.68 | 28.38 | 29.29 | 31.41 | 31.16 |
|      |        | WM2   | 18.8  | 23.5  | 26.53 | 26.93 | 29.1  | 29.37 | 30.75 | 30.71 | 31.66 | 32.73 | 33.49 |
|      |        | WM3   | 20.1  | 24.04 | 25.97 | 26.64 | 28.58 | 28.89 | 30.42 | 30.56 | 30.28 | 31.63 | 31.62 |
|      |        | WM4   | 20.52 | 25.12 | 26.88 | 28.18 | 29.68 | 30.01 | 32.22 | 31.27 | 31.7  | 31.92 | 31.84 |
|      |        | WM5   | 19.82 | 24.74 | 27    | 27.37 | 29.07 | 29.72 | 30.27 | 30.63 | 30.67 | 32.56 | 33    |
|      |        | WM6   | 18.73 | 23.48 | 25.91 | 27.61 | 28.34 | 29.6  | 31.51 | 31.77 | 32    | 32.48 | 31.54 |
|      |        | WM7   | 21.82 | 25.46 | 27.85 | 29.06 | 30    | 30.21 | 32.22 | 32    | 33.42 | 33.56 | 33.88 |
| WM8  |        | 21.16 | 24.68 | 26.19 | 26.62 | 27.02 | 28.24 | 29.17 | 28.89 | 29.42 | 30.73 | 30.5  |       |
| WM9  |        | 20.09 | 23.88 | 25.98 | 27.14 | 27.58 | 28.83 | 30.82 | 31.14 | 31.56 | 34.27 | 33.29 |       |
| WM10 |        | 20.62 | 25.37 | 28.33 | 29.16 | 30.17 | 28.96 | 31.18 | 32.15 | 31.61 | 32.68 | 32.15 |       |
| WM11 |        | 20.43 | 23.23 | 25.29 | 24.75 | 25.69 | 25.15 | 26.63 | 27.18 | 27.5  | 29.24 | 30.4  |       |
| WM12 |        | 21.85 | 23.27 | 26.06 | 26.76 | 27.35 | 26.11 | 28.79 | 29.41 | 29.55 | 31.84 | 32.67 |       |
| WM13 |        | 19.11 | 24.4  | 26.11 | 26.59 | 27.92 | 28.11 | 28.47 | 28.82 | 29.44 | 30.57 | 32.7  |       |
| WM14 |        | 21.19 | 24.92 | 26.63 | 28.07 | 29.14 | 29.58 | 30.08 | 30.7  | 31.95 | 33    | 35.49 |       |
| WM15 |        | 18.34 | 21.63 | 23.56 | 24.41 | 24.99 | 25.68 | 26.63 | 27.77 | 28.27 | 29.25 | 30.59 |       |
| WM16 |        | 19.53 | 23.6  | 25.79 | 26.05 | 26.76 | 28.24 | 28.72 | 29.3  | 29.31 | 31.02 | 30.8  |       |

|     |       |       |       |       |       |       |       |       |       |       |       |       |
|-----|-------|-------|-------|-------|-------|-------|-------|-------|-------|-------|-------|-------|
|     | WM17  | 22.12 | 24.78 | 27.22 | 28.36 | 29.57 | 30.16 | 29.94 | 29.95 | 30.67 | 32.4  | 32.47 |
|     | WM18  | 20.96 | 23.42 | 26.52 | 27.17 | 28.34 | 29.69 | 30.43 | 30.07 | 30.16 | 32    | 33.02 |
|     | WM19  | 20.95 | 24.28 | 27.72 | 28.53 | 29.48 | 30.64 | 31.23 | 30.76 | 31.26 | 33.22 | 33.5  |
|     | WM20  | 22.42 | 25.96 | 27.07 | 28.48 | 29.09 | 29.79 | 31.25 | 31.49 | 31.44 | 32.76 | 32.8  |
|     | WM21  | 21.44 | 25.12 | 27.18 | 29.17 | 30    | 31.44 | 32.07 | 32.06 | 32    | 33.05 | 34.5  |
|     | WM22  | 19.28 | 23.63 | 25.6  | 26.63 | 27.89 | 28.34 | 29.85 | 30.59 | 30.49 | 30.15 | 33.48 |
|     | WM23  | 21.17 | 25.76 | 27.85 | 29.41 | 30.32 | 31.87 | 33.51 | 34.12 | 34.52 | 35.5  | 34.34 |
|     | WM24  | 21.83 | 25.79 | 27.58 | 28.93 | 29.77 | 30.09 | 30.71 | 31.86 | 32.23 | 34    | 33.14 |
|     | CAP1  | 20.69 | 24.74 | 26.37 | 26.38 | 26.84 | 28    | 28.68 | 29.13 | 29.53 | 30.83 | 29.88 |
|     | CAP2  | 21.57 | 25.07 | 27.82 | 28.17 | 28.75 | 29.95 | 30.14 | 30    | 30.52 | 31    | 32.43 |
|     | CAP3  | 21.45 | 25.57 | 27.05 | 27.28 | 27.28 | 28.06 | 28.6  | 29.24 | 29.56 | 29.65 | 30.83 |
|     | CAP4  | 20.68 | 25.89 | 27.87 | 27.91 | 29.17 | 29.33 | 30    | 29.67 | 30    | 30.67 | 31.38 |
|     | CAP5  | 19.4  | 24.24 | 24.28 | 26.39 | 27.5  | 28.37 | 29.51 | 29.37 | 29.2  | 30.14 | 29.54 |
|     | CAP6  | 20.13 | 22.97 | 23.36 | 25.28 | 25.74 | 26.28 | 26.48 | 27.15 | 27.25 | 27.71 | 27.8  |
|     | CAP7  | 20.18 | 24.04 | 23.77 | 25.56 | 26.77 | 27.55 | 28.63 | 28.67 | 28.6  | 28.8  | 29.7  |
|     | CAP8  | 18.49 | 24.63 | 25.24 | 26.72 | 27.39 | 28.21 | 29.05 | 28.89 | 28.89 | 29.77 | 31.26 |
|     | CAP9  | 19.15 | 23.92 | 25.89 | 26.81 | 28.15 | 28.84 | 29.5  | 30.27 | 29.93 | 30.23 | 30.44 |
|     | CAP10 | 20.44 | 23.84 | 25.87 | 26.79 | 27.66 | 28.7  | 29.18 | 29.67 | 29.33 | 29.55 | 29.77 |
|     | CAP11 | 19.45 | 23.96 | 25.9  | 26.18 | 27    | 28.04 | 28.86 | 29.7  | 29.7  | 29.21 | 31    |
| CAP | CAP12 | 22.27 | 25.76 | 27.39 | 28.82 | 30.04 | 30.61 | 30.52 | 30.15 | 30.11 | 30.66 | 32.32 |
|     | CAP13 | 22.38 | 25.27 | 28.03 | 29.41 | 29.75 | 31    | 32    | 31.85 | 32.69 | 32.42 | 33.28 |
|     | CAP14 | 19.86 | 21.76 | 23    | 23.44 | 24.23 | 25.67 | 26.42 | 25.87 | 25.41 | 26    | 26.42 |
|     | CAP15 | 20.06 | 23.35 | 25.74 | 26.93 | 27.74 | 28.41 | 30.23 | 29.74 | 29.61 | 29.17 | 30.41 |
|     | CAP16 | 20.3  | 22.68 | 24.8  | 25.83 | 26.51 | 27.5  | 28.76 | 28.63 | 28.64 | 29    | 30.52 |
|     | CAP17 | 21.42 | 24.33 | 26.27 | 27.18 | 27.95 | 29.46 | 30.25 | 30.49 | 30.86 | 31.38 | 31.85 |
|     | CAP18 | 21.09 | 24.33 | 25.4  | 26.18 | 26.88 | 28.46 | 29.64 | 30.48 | 30.95 | 30.53 | 32.2  |
|     | CAP19 | 20.97 | 23.17 | 24.86 | 25.7  | 25.76 | 27.38 | 28    | 27.92 | 28.22 | 28.7  | 28.72 |
|     | CAP20 | 19.3  | 21.58 | 23.42 | 24.19 | 23.97 | 25.25 | 26.31 | 26.06 | 26.56 | 26.61 | 26.91 |
|     | CAP21 | 20    | 23.25 | 25.16 | 25.98 | 26.93 | 28.07 | 29.74 | 29.49 | 30.18 | 29.2  | 30.53 |
|     | CAP22 | 20    | 22.6  | 24.26 | 23.97 | 25.36 | 25.85 | 27.42 | 27.19 | 27.29 | 27.8  | 27.67 |
|     | CAP23 | 19.97 | 21.5  | 23.58 | 23.72 | 24.58 | 25.5  | 26.02 | 26.26 | 26.61 | 26    | 26.32 |
|     | CAP24 | 20.93 | 24.9  | 26.28 | 27.33 | 28.74 | 28.84 | 30.23 | 29.75 | 30.29 | 29.92 | 30.5  |

| Week  | Food intake(g/week/mouse) |       |       |       |       |       |       |       |       |       |
|-------|---------------------------|-------|-------|-------|-------|-------|-------|-------|-------|-------|
|       | 1                         | 2     | 3     | 4     | 5     | 6     | 7     | 8     | 9     | 10    |
| ND1   | 22.14                     | 23.40 | 23.97 | 22.55 | 23.44 | 23.31 | 22.46 | 22.00 | 25.12 | 23.30 |
| ND2   | 20.46                     | 20.54 | 21.04 | 22.96 | 22.23 | 22.38 | 22.37 | 22.07 | 24.97 | 22.99 |
| ND3   | 20.41                     | 23.37 | 21.49 | 22.43 | 22.75 | 21.53 | 21.83 | 23.60 | 24.40 | 22.26 |
| ND4   | 20.26                     | 24.63 | 18.79 | 22.54 | 22.66 | 20.24 | 20.66 | 21.71 | 24.06 | 23.16 |
| ND5   | 19.80                     | 20.04 | 17.77 | 21.78 | 20.69 | 20.64 | 20.46 | 21.62 | 22.46 | 21.34 |
| ND6   | 20.87                     | 20.82 | 20.83 | 21.37 | 21.75 | 20.55 | 20.09 | 21.08 | 21.62 | 19.14 |
| HFFD1 | 15.62                     | 17.47 | 17.64 | 18.96 | 19.14 | 17.48 | 17.05 | 18.45 | 21.16 | 19.72 |
| HFFD2 | 19.41                     | 21.06 | 18.43 | 19.61 | 18.73 | 18.58 | 18.70 | 19.15 | 21.32 | 19.34 |
| HFFD3 | 20.49                     | 21.79 | 19.10 | 19.61 | 19.51 | 18.17 | 18.51 | 21.20 | 20.24 | 19.45 |
| HFFD4 | 19.98                     | 18.65 | 19.30 | 19.16 | 19.47 | 18.53 | 19.81 | 20.44 | 20.55 | 19.52 |
| HFFD5 | 19.09                     | 19.43 | 20.10 | 20.40 | 20.51 | 18.71 | 19.11 | 20.60 | 21.74 | 20.17 |
| HFFD6 | 19.85                     | 20.60 | 19.91 | 20.01 | 20.53 | 20.73 | 19.15 | 21.43 | 22.64 | 19.62 |
| WM1   | 19.55                     | 18.26 | 18.30 | 19.21 | 20.38 | 17.99 | 18.18 | 19.50 | 19.32 | 20.13 |
| WM2   | 20.67                     | 19.70 | 19.05 | 19.23 | 19.59 | 19.12 | 17.37 | 19.77 | 19.51 | 18.76 |
| WM3   | 21.06                     | 20.50 | 17.76 | 18.60 | 18.49 | 17.88 | 18.07 | 19.05 | 19.86 | 20.49 |
| WM4   | 18.68                     | 18.20 | 18.01 | 18.69 | 18.58 | 17.87 | 18.85 | 18.24 | 20.81 | 19.84 |
| WM5   | 19.78                     | 19.23 | 19.32 | 19.34 | 20.07 | 18.31 | 17.96 | 19.99 | 19.97 | 20.35 |
| WM6   | 19.92                     | 20.70 | 21.68 | 21.42 | 20.67 | 18.77 | 19.82 | 20.87 | 21.77 | 18.59 |
| CAP1  | 20.26                     | 18.08 | 18.59 | 18.93 | 15.55 | 17.41 | 17.85 | 20.17 | 19.76 | 22.65 |
| CAP2  | 21.97                     | 20.71 | 18.89 | 19.05 | 16.36 | 18.73 | 17.03 | 20.74 | 20.60 | 21.33 |
| CAP3  | 20.78                     | 20.98 | 17.97 | 20.65 | 17.30 | 20.04 | 19.41 | 22.30 | 21.72 | 23.96 |
| CAP4  | 17.81                     | 16.98 | 16.36 | 18.60 | 17.27 | 17.52 | 18.39 | 16.70 | 18.05 | 18.17 |
| CAP5  | 19.62                     | 17.01 | 17.34 | 17.85 | 17.12 | 19.18 | 18.14 | 17.76 | 18.51 | 19.26 |
| CAP6  | 20.81                     | 18.20 | 18.34 | 18.61 | 18.94 | 18.61 | 18.66 | 17.88 | 18.90 | 20.71 |

| Week  | Food intake(g/day/mouse) |           |           |           |          |          |           |         |         |          |
|-------|--------------------------|-----------|-----------|-----------|----------|----------|-----------|---------|---------|----------|
|       | 1                        | 2         | 3         | 4         | 5        | 6        | 7         | 8       | 9       | 10       |
| ND1   | 3.1634286                | 3.3433329 | 3.4245714 | 3.2214286 | 3.349143 | 3.33     | 3.2082857 | 3.14286 | 3.58833 | 3.3292   |
| ND2   | 2.9228571                | 2.934     | 3.006     | 3.2805714 | 3.175143 | 3.197143 | 3.1957143 | 3.15343 | 3.56667 | 3.2844   |
| ND3   | 2.9154286                | 3.3383329 | 3.0692857 | 3.2042857 | 3.249286 | 3.075357 | 3.1182143 | 3.37107 | 3.48625 | 3.18     |
| ND4   | 2.8945714                | 3.5183329 | 2.6845714 | 3.2194286 | 3.237143 | 2.891429 | 2.9511429 | 3.10086 | 3.437   | 3.3085   |
| ND5   | 2.828                    | 2.8623329 | 2.5385714 | 3.1117143 | 2.955714 | 2.949143 | 2.9228571 | 3.08914 | 3.209   | 3.048    |
| ND6   | 2.982                    | 2.9746671 | 2.976     | 3.0531429 | 3.107714 | 2.936286 | 2.8694286 | 3.01086 | 3.088   | 2.7336   |
| HFFD1 | 2.2316671                | 2.4961114 | 2.5202386 | 2.70881   | 2.734524 | 2.496667 | 2.4352386 | 2.63619 | 3.02306 | 2.816667 |
| HFFD2 | 2.7728571                | 3.0083329 | 2.6322857 | 2.8008571 | 2.676286 | 2.654286 | 2.6714286 | 2.73543 | 3.04633 | 2.7624   |
| HFFD3 | 2.9274286                | 3.1123329 | 2.7288571 | 2.8014286 | 2.786571 | 2.595714 | 2.6445714 | 3.028   | 2.89133 | 2.7792   |
| HFFD4 | 2.8545714                | 2.6646671 | 2.7577143 | 2.7374286 | 2.781143 | 2.647429 | 2.83      | 2.92    | 2.93633 | 2.7884   |
| HFFD5 | 2.7265714                | 2.7756671 | 2.8711429 | 2.9148571 | 2.930571 | 2.673429 | 2.7302857 | 2.94286 | 3.10567 | 2.8808   |
| HFFD6 | 2.8354286                | 2.943     | 2.8442857 | 2.8588571 | 2.933429 | 2.961429 | 2.7362857 | 3.06171 | 3.23467 | 2.8028   |
| WM1   | 2.7930957                | 2.6091671 | 2.6147614 | 2.7440471 | 2.910953 | 2.57     | 2.5964286 | 2.78548 | 2.76028 | 2.875    |
| WM2   | 2.9525714                | 2.814     | 2.722     | 2.7465714 | 2.799143 | 2.730857 | 2.482     | 2.82371 | 2.78767 | 2.6796   |
| WM3   | 3.0082857                | 2.928     | 2.5374286 | 2.6574286 | 2.642    | 2.554286 | 2.5817143 | 2.72143 | 2.83733 | 2.9276   |
| WM4   | 2.6688571                | 2.6       | 2.5731429 | 2.6697143 | 2.653714 | 2.552571 | 2.6922857 | 2.606   | 2.97267 | 2.834    |
| WM5   | 2.826                    | 2.7466671 | 2.7597143 | 2.7625714 | 2.866571 | 2.615429 | 2.5657143 | 2.85571 | 2.85233 | 2.9068   |
| WM6   | 2.8454286                | 2.9566671 | 3.0971429 | 3.0605714 | 2.9535   | 2.681333 | 2.8311429 | 2.98114 | 3.10933 | 2.6552   |
| CAP1  | 2.8942857                | 2.5825    | 2.655     | 2.7042857 | 2.22125  | 2.486667 | 2.55      | 2.88071 | 2.82278 | 3.235    |
| CAP2  | 3.1391429                | 2.9586671 | 2.6985714 | 2.7214286 | 2.337    | 2.676    | 2.4331429 | 2.96229 | 2.943   | 3.0476   |
| CAP3  | 2.9691429                | 2.9973329 | 2.5671429 | 2.9502857 | 2.472    | 2.863    | 2.7731429 | 3.18629 | 3.10333 | 3.4224   |
| CAP4  | 2.544                    | 2.426     | 2.3374286 | 2.6577143 | 2.46675  | 2.503    | 2.6265714 | 2.38514 | 2.57867 | 2.5952   |
| CAP5  | 2.8031429                | 2.4306671 | 2.4768571 | 2.5494286 | 2.446    | 2.739667 | 2.5911429 | 2.53657 | 2.64467 | 2.7512   |
| CAP6  | 2.9728571                | 2.6       | 2.6194286 | 2.6591429 | 2.7055   | 2.658333 | 2.6651429 | 2.554   | 2.7     | 2.9584   |

| Total bodyweight gain (g/mouse) |       |       |       | bodyweight gain (g/mouse/day) |         |         |         | food intake (g/day/mouse) |      |      |      | Food efficiency (%) |          |          |          |
|---------------------------------|-------|-------|-------|-------------------------------|---------|---------|---------|---------------------------|------|------|------|---------------------|----------|----------|----------|
| ND                              | HFFD  | WM    | CAP   | ND                            | HFFD    | WM      | CAP     | ND                        | HFFD | WM   | CAP  | ND                  | HFFD     | WM       | CAP      |
| 5.05                            | 14.36 | 12.9  | 9.19  | 0.07214                       | 0.20514 | 0.18429 | 0.13129 | 3.12                      | 2.8  | 2.77 | 2.71 | 2.312271            | 7.326531 | 6.652914 | 4.844491 |
| 4.95                            | 11.6  | 14.69 | 10.86 | 0.07071                       | 0.16571 | 0.20986 | 0.15514 |                           |      |      |      | 2.266484            | 5.918367 | 7.576070 | 5.724829 |
| 5.77                            | 13.08 | 11.52 | 9.38  | 0.08243                       | 0.18686 | 0.16457 | 0.13400 |                           |      |      |      | 2.641941            | 6.673469 | 5.941207 | 4.944649 |
| 7.71                            | 11.49 | 11.32 | 10.7  | 0.11014                       | 0.16414 | 0.16171 | 0.15286 |                           |      |      |      | 3.530220            | 5.862245 | 5.838061 | 5.640485 |
| 6.51                            | 12.18 | 13.18 | 10.14 | 0.09300                       | 0.17400 | 0.18829 | 0.14486 |                           |      |      |      | 2.980769            | 6.214286 | 6.797318 | 5.345282 |
| 8.72                            | 11.82 | 12.81 | 7.67  | 0.12457                       | 0.16886 | 0.18300 | 0.10957 |                           |      |      |      | 3.992674            | 6.030612 | 6.606498 | 4.043226 |
| 6.44                            | 12.79 | 12.06 | 9.52  | 0.09200                       | 0.18271 | 0.17229 | 0.13600 |                           |      |      |      | 2.948718            | 6.525510 | 6.219701 | 5.018450 |
| 7.4                             | 10.48 | 9.34  | 12.77 | 0.10571                       | 0.14971 | 0.13343 | 0.18243 |                           |      |      |      | 3.388278            | 5.346939 | 4.816916 | 6.731682 |
| 7.68                            | 11.33 | 13.2  | 11.29 | 0.10971                       | 0.16186 | 0.18857 | 0.16129 |                           |      |      |      | 3.516484            | 5.780612 | 6.807633 | 5.951502 |
| 8                               | 9.7   | 11.53 | 9.33  | 0.11429                       | 0.13857 | 0.16471 | 0.13329 |                           |      |      |      | 3.663004            | 4.948980 | 5.946364 | 4.918292 |
| 7.16                            | 10.79 | 9.97  | 11.55 | 0.10229                       | 0.15414 | 0.14243 | 0.16500 |                           |      |      |      | 3.278388            | 5.505102 | 5.141826 | 6.088561 |
| 7.65                            | 12.05 | 10.82 | 10.05 | 0.10929                       | 0.17214 | 0.15457 | 0.14357 |                           |      |      |      | 3.502747            | 6.147959 | 5.580196 | 5.297839 |
| 9.76                            | 12.61 | 13.59 | 10.9  | 0.13943                       | 0.18014 | 0.19414 | 0.15571 |                           |      |      |      | 4.468864            | 6.433673 | 7.008767 | 5.745915 |
| 9.83                            | 12.51 | 14.3  | 6.56  | 0.14043                       | 0.17871 | 0.20429 | 0.09371 |                           |      |      |      | 4.500916            | 6.382653 | 7.374936 | 3.458092 |
| 9                               | 15.21 | 12.25 | 10.35 | 0.12857                       | 0.21729 | 0.17500 | 0.14786 |                           |      |      |      | 4.120879            | 7.760204 | 6.317690 | 5.455983 |
| 7.33                            | 11.57 | 11.27 | 10.22 | 0.10471                       | 0.16529 | 0.16100 | 0.14600 |                           |      |      |      | 3.356227            | 5.903061 | 5.812274 | 5.387454 |
| 7.51                            | 10.51 | 10.35 | 10.43 | 0.10729                       | 0.15014 | 0.14786 | 0.14900 |                           |      |      |      | 3.438645            | 5.362245 | 5.337803 | 5.498155 |
| 7.8                             | 11.58 | 12.06 | 11.11 | 0.11143                       | 0.16543 | 0.17229 | 0.15871 |                           |      |      |      | 3.571429            | 5.908163 | 6.219701 | 5.856616 |
| 8.63                            | 11.41 | 12.55 | 7.75  | 0.12329                       | 0.16300 | 0.17929 | 0.11071 |                           |      |      |      | 3.951465            | 5.821429 | 6.472408 | 4.085398 |
| 7.69                            | 13.1  | 10.38 | 7.61  | 0.10986                       | 0.18714 | 0.14829 | 0.10871 |                           |      |      |      | 3.521062            | 6.683673 | 5.353275 | 4.011597 |
| 7.28                            | 13.07 | 13.06 | 10.53 | 0.10400                       | 0.18671 | 0.18657 | 0.15043 |                           |      |      |      | 3.333333            | 6.668367 | 6.735431 | 5.550870 |
| 5.97                            | 13.55 | 14.2  | 7.67  | 0.08529                       | 0.19357 | 0.20286 | 0.10957 |                           |      |      |      | 2.733516            | 6.913265 | 7.323363 | 4.043226 |
| 7.81                            | 11.81 | 13.17 | 6.35  | 0.11157                       | 0.16871 | 0.18814 | 0.09071 |                           |      |      |      | 3.576007            | 6.025510 | 6.792161 | 3.347391 |
| 6.07                            | 12.8  | 11.31 | 9.57  | 0.08671                       | 0.18286 | 0.16157 | 0.13671 |                           |      |      |      | 2.779304            | 6.530612 | 5.832904 | 5.044808 |

| Week  | Water intake(g/week/mouse) |       |       |       |       |       |       |       |       |       |
|-------|----------------------------|-------|-------|-------|-------|-------|-------|-------|-------|-------|
|       | 1                          | 2     | 3     | 4     | 5     | 6     | 7     | 8     | 9     | 10    |
| ND1   | 22.60                      | 32.92 | 29.52 | 34.35 | 32.54 | 30.30 | 31.68 | 32.78 | 46.68 | 39.16 |
| ND2   | 18.21                      | 35.54 | 25.75 | 28.70 | 28.77 | 29.24 | 30.75 | 32.00 | 37.99 | 34.32 |
| ND3   | 17.50                      | 35.86 | 23.49 | 25.79 | 27.45 | 28.13 | 29.39 | 31.84 | 36.48 | 32.58 |
| ND4   | 24.52                      | 26.15 | 30.35 | 35.19 | 36.62 | 33.38 | 36.22 | 40.21 | 46.51 | 38.06 |
| ND5   | 19.61                      | 35.22 | 21.09 | 25.45 | 25.31 | 25.03 | 25.66 | 28.71 | 31.50 | 30.17 |
| ND6   | 20.31                      | 36.78 | 22.31 | 22.99 | 23.57 | 23.99 | 23.94 | 25.30 | 30.70 | 26.53 |
| HFFD1 | 29.91                      | 31.41 | 34.00 | 39.89 | 40.74 | 36.44 | 38.00 | 41.10 | 49.42 | 55.97 |
| HFFD2 | 24.49                      | 32.39 | 32.29 | 39.96 | 42.06 | 33.00 | 32.36 | 34.84 | 36.31 | 32.20 |
| HFFD3 | 25.05                      | 44.51 | 44.40 | 35.62 | 37.55 | 33.25 | 31.85 | 35.48 | 50.06 | 58.71 |
| HFFD4 | 29.00                      | 34.55 | 36.93 | 39.41 | 40.90 | 35.90 | 37.11 | 38.72 | 42.52 | 42.02 |
| HFFD5 | 29.32                      | 34.71 | 37.21 | 39.90 | 44.36 | 37.25 | 38.17 | 40.95 | 46.75 | 42.50 |
| HFFD6 | 29.91                      | 36.19 | 33.98 | 43.88 | 43.97 | 38.28 | 35.99 | 42.58 | 43.54 | 42.50 |
| WM1   | 27.83                      | 31.05 | 32.34 | 37.04 | 39.07 | 34.40 | 39.45 | 41.84 | 39.68 | 38.68 |
| WM2   | 22.76                      | 35.65 | 35.79 | 34.54 | 45.06 | 35.90 | 37.05 | 38.02 | 42.07 | 42.30 |
| WM3   | 26.46                      | 37.39 | 36.17 | 40.85 | 55.02 | 43.19 | 39.12 | 41.73 | 51.35 | 48.36 |
| WM4   | 28.71                      | 43.30 | 40.34 | 41.62 | 43.03 | 34.31 | 40.81 | 47.37 | 49.15 | 42.23 |
| WM5   | 30.28                      | 43.88 | 31.31 | 36.13 | 46.46 | 40.51 | 38.37 | 38.85 | 44.21 | 43.61 |
| WM6   | 34.19                      | 38.12 | 34.50 | 35.08 | 36.60 | 35.95 | 36.23 | 40.73 | 40.95 | 44.64 |
| CAP1  | 30.78                      | 29.39 | 30.89 | 35.83 | 36.13 | 36.96 | 37.15 | 30.60 | 30.05 | 30.85 |
| CAP2  | 28.71                      | 47.71 | 46.89 | 44.61 | 43.63 | 39.97 | 35.25 | 39.31 | 39.52 | 36.67 |
| CAP3  | 24.69                      | 37.22 | 37.99 | 39.36 | 49.20 | 35.67 | 41.99 | 35.30 | 35.00 | 38.85 |
| CAP4  | 28.69                      | 32.44 | 30.44 | 35.10 | 46.89 | 32.78 | 33.55 | 29.57 | 22.93 | 23.96 |
| CAP5  | 32.03                      | 34.46 | 31.88 | 32.59 | 48.18 | 35.17 | 34.81 | 34.01 | 26.88 | 28.02 |
| CAP6  | 29.39                      | 34.07 | 36.65 | 37.15 | 41.86 | 41.76 | 41.82 | 33.69 | 34.76 | 33.50 |

| Week  | Water intake(g/day/mouse) |             |             |             |             |             |             |             |             |             |
|-------|---------------------------|-------------|-------------|-------------|-------------|-------------|-------------|-------------|-------------|-------------|
|       | 1                         | 2           | 3           | 4           | 5           | 6           | 7           | 8           | 9           | 10          |
| ND1   | 3.228857143               | 4.703332857 | 4.217       | 4.906667143 | 4.648285714 | 4.328857143 | 4.5255      | 4.682285714 | 6.669142857 | 5.594667143 |
| ND2   | 2.601142857               | 5.076667143 | 3.679       | 4.099667143 | 4.109428571 | 4.176857143 | 4.393       | 4.571142857 | 5.426857143 | 4.903332857 |
| ND3   | 2.499714286               | 5.123332857 | 3.355       | 3.68375     | 3.921071429 | 4.017857143 | 4.198437143 | 4.548571429 | 5.211428571 | 4.654167143 |
| ND4   | 3.502857143               | 3.736       | 4.33625     | 5.026667143 | 5.230857143 | 4.768285714 | 5.17375     | 5.744571429 | 6.644285714 | 5.437332857 |
| ND5   | 2.801714286               | 5.031332857 | 3.01325     | 3.636       | 3.615142857 | 3.575142857 | 3.66625     | 4.101714286 | 4.499714286 | 4.31        |
| ND6   | 2.900857143               | 5.254332857 | 3.18725     | 3.284667143 | 3.367714286 | 3.426571429 | 3.41975     | 3.614       | 4.385428571 | 3.790667143 |
| HFFD1 | 4.273095714               | 4.486944286 | 4.857291429 | 5.699167143 | 5.820475714 | 5.205475714 | 5.428541429 | 5.871904286 | 7.059761429 | 7.996111429 |
| HFFD2 | 3.499142857               | 4.627       | 4.6125      | 5.709       | 6.009142857 | 4.714       | 4.6235      | 4.976571429 | 5.187428571 | 4.6         |
| HFFD3 | 3.579142857               | 6.358       | 6.343       | 5.088667143 | 5.363714286 | 4.750285714 | 4.55025     | 5.068       | 7.151142857 | 8.387332857 |
| HFFD4 | 4.142857143               | 4.936       | 5.27525     | 5.629667143 | 5.842285714 | 5.128571429 | 5.302       | 5.531714286 | 6.074       | 6.003332857 |
| HFFD5 | 4.188571429               | 4.958667143 | 5.3155      | 5.699667143 | 6.337714286 | 5.322       | 5.453       | 5.850571429 | 6.678285714 | 6.072       |
| HFFD6 | 4.272857143               | 5.169332857 | 4.854       | 6.269       | 6.281714286 | 5.468857143 | 5.14075     | 6.082857143 | 6.220571429 | 6.071332857 |
| WM1   | 3.97619                   | 4.435555714 | 4.620625714 | 5.291388571 | 5.580714286 | 4.914285714 | 5.635417143 | 5.977142857 | 5.669047143 | 5.526111429 |
| WM2   | 3.251428571               | 5.093332857 | 5.11275     | 4.934       | 6.437714286 | 5.128       | 5.293       | 5.431142857 | 6.009714286 | 6.042667143 |
| WM3   | 3.779428571               | 5.341       | 5.167       | 5.835332857 | 7.859428571 | 6.169714286 | 5.589       | 5.960857143 | 7.335142857 | 6.908       |
| WM4   | 4.101428571               | 6.186332857 | 5.76225     | 5.946332857 | 6.146571429 | 4.901428571 | 5.82975     | 6.766857143 | 7.022       | 6.032667143 |
| WM5   | 4.325714286               | 6.269       | 4.473       | 5.161667143 | 6.637714286 | 5.786571429 | 5.4815      | 5.55        | 6.315714286 | 6.229332857 |
| WM6   | 4.883714286               | 5.446332857 | 4.929       | 5.011667143 | 5.229142857 | 5.136285714 | 5.17575     | 5.818571429 | 5.850571429 | 6.376667143 |
| CAP1  | 4.397381429               | 4.198611429 | 4.412708571 | 5.118611429 | 5.160714286 | 5.279761429 | 5.306458571 | 4.370714286 | 4.293332857 | 4.407222857 |
| CAP2  | 4.100857143               | 6.815667143 | 6.69825     | 6.372332857 | 6.232571429 | 5.710285714 | 5.03575     | 5.615428571 | 5.645428571 | 5.238667143 |
| CAP3  | 3.527428571               | 5.317       | 5.42675     | 5.623332857 | 7.028       | 5.095142857 | 5.99875     | 5.042857143 | 5           | 5.549332857 |
| CAP4  | 4.098857143               | 4.634       | 4.348       | 5.014       | 6.699142857 | 4.682857143 | 4.7935      | 4.224       | 3.275142857 | 3.423332857 |
| CAP5  | 4.575428571               | 4.923332857 | 4.5545      | 4.656       | 6.883428571 | 5.024       | 4.97325     | 4.858       | 3.84        | 4.002667143 |
| CAP6  | 4.198285714               | 4.867       | 5.235       | 5.307332857 | 5.979428571 | 5.965428571 | 5.97425     | 4.813142857 | 4.965428571 | 4.786       |



Energy intake  
 ND group: Normal diet 3.85 kcal/g  
 Other group: 4.73 kcal/g/diet+0.6kcal/ml/water

| Food intake (g/week/mouse) |      |      |      | Water intake (g/week/mouse) |      |      |      | Energy intake (kcal/mouse/day) |         |         |         |
|----------------------------|------|------|------|-----------------------------|------|------|------|--------------------------------|---------|---------|---------|
| ND                         | HFFD | WM   | CAP  | ND                          | HFFD | WM   | CAP  | ND                             | HFFD    | WM      | CAP     |
| 3.16                       | 2.23 | 2.79 | 2.89 | 3.23                        | 4.27 | 3.98 | 4.40 | 12.166                         | 13.1099 | 15.5847 | 16.3097 |
| 2.92                       | 2.5  | 2.61 | 2.58 | 4.70                        | 4.49 | 4.44 | 4.20 | 11.242                         | 14.519  | 15.0093 | 14.7234 |
| 2.92                       | 2.52 | 2.61 | 2.66 | 4.22                        | 4.86 | 4.62 | 4.41 | 11.242                         | 14.8356 | 15.1173 | 15.2278 |
| 2.89                       | 2.71 | 2.74 | 2.7  | 4.91                        | 5.70 | 5.29 | 5.12 | 11.1265                        | 16.2383 | 16.1342 | 15.843  |
| 2.83                       | 2.73 | 2.91 | 2.22 | 4.65                        | 5.82 | 5.58 | 5.16 | 10.8955                        | 16.4049 | 17.1123 | 13.5966 |
| 2.98                       | 2.5  | 2.57 | 2.49 | 4.33                        | 5.21 | 4.91 | 5.28 | 11.473                         | 14.951  | 15.1021 | 14.9457 |
| 3.34                       | 2.44 | 2.6  | 2.55 | 4.53                        | 5.43 | 5.64 | 5.31 | 12.859                         | 14.7992 | 15.682  | 15.2475 |
| 2.93                       | 2.64 | 2.79 | 2.88 | 4.68                        | 5.87 | 5.98 | 4.37 | 11.2805                        | 16.0092 | 16.7847 | 16.2444 |
| 3.34                       | 3.02 | 2.76 | 2.82 | 6.67                        | 7.06 | 5.67 | 4.29 | 12.859                         | 18.5206 | 16.4568 | 15.9126 |
| 3.52                       | 2.82 | 2.88 | 3.24 | 5.59                        | 8.00 | 5.53 | 4.41 | 13.552                         | 18.1386 | 16.9404 | 17.9712 |
| 2.86                       | 2.77 | 2.95 | 3.14 | 2.60                        | 3.50 | 3.25 | 4.10 | 11.011                         | 15.2021 | 15.9035 | 17.3122 |
| 2.97                       | 3.01 | 2.81 | 2.96 | 5.08                        | 4.63 | 5.09 | 6.82 | 11.4345                        | 17.0153 | 16.3453 | 18.0928 |
| 3.42                       | 2.63 | 2.72 | 2.7  | 3.68                        | 4.61 | 5.11 | 6.70 | 13.167                         | 15.2059 | 15.9316 | 16.791  |
| 3.01                       | 2.8  | 2.75 | 2.72 | 4.10                        | 5.71 | 4.93 | 6.37 | 11.5885                        | 16.67   | 15.9655 | 16.6876 |
| 3.07                       | 2.68 | 2.8  | 2.34 | 4.11                        | 6.01 | 6.44 | 6.23 | 11.8195                        | 16.2824 | 17.108  | 14.8062 |
| 2.68                       | 2.65 | 2.73 | 2.68 | 4.18                        | 4.71 | 5.13 | 5.71 | 10.318                         | 15.3605 | 15.9909 | 16.1024 |
| 2.54                       | 2.67 | 2.48 | 2.43 | 4.39                        | 4.62 | 5.29 | 5.04 | 9.779                          | 15.4011 | 14.9044 | 14.5179 |
| 2.98                       | 2.74 | 2.82 | 2.96 | 4.57                        | 4.98 | 5.43 | 5.62 | 11.473                         | 15.9482 | 16.5966 | 17.3728 |
| 3.22                       | 3.05 | 2.79 | 2.94 | 5.43                        | 5.19 | 6.01 | 5.65 | 12.397                         | 17.5405 | 16.8027 | 17.2962 |
| 3.28                       | 2.76 | 2.68 | 3.05 | 4.90                        | 4.60 | 6.04 | 5.24 | 12.628                         | 15.8148 | 16.3004 | 17.5705 |
| 3.2                        | 2.93 | 3.01 | 2.97 | 2.50                        | 3.58 | 3.78 | 3.53 | 12.32                          | 16.0069 | 16.5053 | 16.1661 |
| 3.22                       | 3.11 | 2.93 | 3    | 5.12                        | 6.36 | 5.34 | 5.32 | 12.397                         | 18.5263 | 17.0629 | 17.382  |
| 3.11                       | 2.73 | 2.54 | 2.57 | 3.36                        | 6.34 | 5.17 | 5.43 | 11.9735                        | 16.7169 | 15.1162 | 15.4141 |
| 3.05                       | 2.8  | 2.66 | 2.95 | 3.68                        | 5.09 | 5.84 | 5.62 | 11.7425                        | 16.298  | 16.0858 | 17.3255 |
| 3.35                       | 2.79 | 2.64 | 2.47 | 3.92                        | 5.36 | 7.86 | 7.03 | 12.8975                        | 16.4127 | 17.2032 | 15.9011 |
| 3.18                       | 2.6  | 2.55 | 2.86 | 4.02                        | 4.75 | 6.17 | 5.10 | 12.243                         | 15.148  | 15.7635 | 16.5878 |
| 3.25                       | 2.64 | 2.58 | 2.77 | 4.20                        | 4.55 | 5.59 | 6.00 | 12.5125                        | 15.2172 | 15.5574 | 16.7021 |
| 3.24                       | 3.03 | 2.72 | 3.19 | 4.55                        | 5.07 | 5.96 | 5.04 | 12.474                         | 17.3739 | 16.4416 | 18.1127 |

|      |      |      |      |      |      |      |      |         |         |         |         |
|------|------|------|------|------|------|------|------|---------|---------|---------|---------|
| 2.96 | 2.89 | 2.84 | 3.1  | 5.21 | 7.15 | 7.34 | 5.00 | 11.396  | 17.9597 | 17.8372 | 17.663  |
| 3.11 | 2.78 | 2.93 | 3.42 | 4.65 | 8.39 | 6.91 | 5.55 | 11.9735 | 18.1834 | 18.0049 | 19.5066 |
| 3.33 | 2.85 | 2.67 | 2.54 | 3.50 | 4.14 | 4.10 | 4.10 | 12.8205 | 15.9645 | 15.0891 | 14.4742 |
| 3.2  | 2.66 | 2.6  | 2.43 | 3.74 | 4.94 | 6.19 | 4.63 | 12.32   | 15.5458 | 16.012  | 14.2719 |
| 3.08 | 2.76 | 2.57 | 2.34 | 4.34 | 5.28 | 5.76 | 4.35 | 11.858  | 16.2228 | 15.6121 | 13.6782 |
| 2.89 | 2.74 | 2.67 | 2.66 | 5.03 | 5.63 | 5.95 | 5.01 | 11.1265 | 16.3382 | 16.1991 | 15.5878 |
| 2.95 | 2.78 | 2.65 | 2.47 | 5.23 | 5.84 | 6.15 | 6.70 | 11.3575 | 16.6534 | 16.2245 | 15.7031 |
| 2.94 | 2.65 | 2.55 | 2.5  | 4.77 | 5.13 | 4.90 | 4.68 | 11.319  | 15.6125 | 15.0015 | 14.633  |
| 3.21 | 2.83 | 2.69 | 2.63 | 5.17 | 5.30 | 5.83 | 4.79 | 12.3585 | 16.5659 | 16.2217 | 15.3139 |
| 3.2  | 2.92 | 2.61 | 2.39 | 5.74 | 5.53 | 6.77 | 4.22 | 12.32   | 17.1296 | 16.4073 | 13.8367 |
| 3.12 | 2.94 | 2.97 | 2.58 | 6.64 | 6.07 | 7.02 | 3.28 | 12.012  | 17.5482 | 18.2601 | 14.1714 |
| 2.95 | 2.79 | 2.83 | 2.6  | 5.44 | 6.00 | 6.03 | 3.42 | 11.3575 | 16.7967 | 17.0039 | 14.35   |
| 2.92 | 2.73 | 2.83 | 2.8  | 2.80 | 4.19 | 4.33 | 4.58 | 11.242  | 15.4269 | 15.9839 | 15.992  |
| 2.87 | 2.78 | 2.75 | 2.43 | 5.03 | 4.96 | 6.27 | 4.92 | 11.0495 | 16.1254 | 16.7695 | 14.4459 |
| 3.14 | 2.87 | 2.76 | 2.48 | 3.01 | 5.32 | 4.47 | 4.55 | 12.089  | 16.7671 | 15.7368 | 14.4604 |
| 3.15 | 2.91 | 2.76 | 2.55 | 3.64 | 5.70 | 5.16 | 4.66 | 12.1275 | 17.1843 | 16.1508 | 14.8575 |
| 3.37 | 2.93 | 2.87 | 2.45 | 3.62 | 6.34 | 6.64 | 6.88 | 12.9745 | 17.6629 | 17.5591 | 15.7165 |
| 3.1  | 2.67 | 2.62 | 2.74 | 3.58 | 5.32 | 5.79 | 5.02 | 11.935  | 15.8211 | 15.8666 | 15.9722 |
| 3.09 | 2.73 | 2.57 | 2.59 | 3.67 | 5.45 | 5.48 | 4.97 | 11.8965 | 16.1829 | 15.4441 | 15.2327 |
| 3.01 | 2.94 | 2.86 | 2.54 | 4.10 | 5.85 | 5.55 | 4.86 | 11.5885 | 17.4162 | 16.8578 | 14.9302 |
| 3.59 | 3.11 | 2.85 | 2.64 | 4.50 | 6.68 | 6.32 | 3.84 | 13.8215 | 18.7183 | 17.2725 | 14.7912 |
| 3.57 | 2.88 | 2.91 | 2.75 | 4.31 | 6.07 | 6.23 | 4.00 | 13.7445 | 17.2644 | 17.5023 | 15.4075 |
| 3.49 | 2.84 | 2.85 | 2.97 | 2.90 | 4.27 | 4.88 | 4.20 | 13.4365 | 15.9952 | 16.4085 | 16.5681 |
| 3.44 | 2.94 | 2.96 | 2.6  | 5.25 | 5.17 | 5.45 | 4.87 | 13.244  | 17.0082 | 17.2708 | 15.22   |
| 3.21 | 2.84 | 3.1  | 2.62 | 3.19 | 4.85 | 4.93 | 5.24 | 12.3585 | 16.3432 | 17.621  | 15.5366 |
| 3.09 | 2.86 | 3.06 | 2.66 | 3.28 | 6.27 | 5.01 | 5.31 | 11.8965 | 17.2898 | 17.4798 | 15.7678 |
| 3.33 | 2.93 | 2.95 | 2.71 | 3.37 | 6.28 | 5.23 | 5.98 | 12.8205 | 17.6269 | 17.0915 | 16.4063 |
| 3.28 | 2.96 | 2.68 | 2.66 | 3.43 | 5.47 | 5.14 | 5.97 | 12.628  | 17.2828 | 15.7604 | 16.1638 |
| 3.18 | 2.74 | 2.83 | 2.67 | 3.42 | 5.14 | 5.18 | 5.97 | 12.243  | 16.0442 | 16.4939 | 16.2111 |
| 3.31 | 3.06 | 2.98 | 2.55 | 3.61 | 6.08 | 5.82 | 4.81 | 12.7435 | 18.1218 | 17.5874 | 14.9475 |
| 3.05 | 3.23 | 3.11 | 2.7  | 4.39 | 6.22 | 5.85 | 4.97 | 11.7425 | 19.0099 | 18.2203 | 15.753  |
| 2.73 | 2.8  | 2.66 | 2.96 | 3.79 | 6.07 | 6.38 | 4.79 | 10.5105 | 16.886  | 16.4098 | 16.8748 |

LefSe

| ZT0                   |           |       |           | ZT12     |                           |           |       |           |          |
|-----------------------|-----------|-------|-----------|----------|---------------------------|-----------|-------|-----------|----------|
| Taxa                  | Abundance | Group | LDA_score | Pvalue   | Taxa                      | Abundance | Group | LDA_score | Pvalue   |
| Bacteria.Actinobacte  | 4.871544  |       | -         |          | Bacteria.Actinobacteria.  | 4.85374   |       | -         |          |
| Bacteria.Firmicutes.E | 3.020875  |       | -         |          | Bacteria.Firmicutes.Bac   | 3.008525  |       | -         |          |
| Bacteria.Firmicutes.C | 2.616598  | ND    | 3.309539  | 0.001971 | Bacteria.Firmicutes.Bac   | 0.904663  |       | -         |          |
| Bacteria.Firmicutes.E | 1.585236  |       | -         |          | Bacteria.Firmicutes.Bac   | 1.89991   |       | -         |          |
| Bacteria.Firmicutes.E | 1.56469   |       | -         |          | Bacteria.Actinobacteria.  | 1.916484  |       | -         |          |
| Bacteria.Actinobacte  | 1.599452  |       | -         |          | Bacteria.Proteobacteria.. | 2.82277   |       | -         |          |
| Bacteria.Proteobacter | 2.819086  | CAP   | 3.217703  | 0.004851 | Bacteria.Firmicutes.Clos  | 1.28323   |       | -         |          |
| Bacteria.Proteobacter | 0.93928   |       | -         |          | Bacteria.Actinobacteria.  | 2.535386  |       | -         |          |
| Bacteria.Actinobacte  | 2.252428  |       | -         |          | Bacteria.Firmicutes.Bac   | 0.786172  |       | -         |          |
| Bacteria.Proteobacter | 1.985228  |       | -         |          | Bacteria.Firmicutes.Clos  | 2.698181  |       | -         |          |
| Bacteria.Proteobacter | 1.022731  |       | -         |          | Bacteria.Actinobacteria.  | 0.786825  |       | -         |          |
| Bacteria.Firmicutes.C | 3.091214  |       | -         |          | Bacteria.Cyanobacteria.0  | 1.95555   |       | -         |          |
| Bacteria.Cyanobacter  | 1.71477   |       | -         |          | Bacteria.Actinobacteria.  | 1.104279  |       | -         |          |
| Bacteria.Actinobacte  | 0.733425  |       | -         |          | Bacteria.Proteobacteria.0 | 1.64643   |       | -         |          |
| Bacteria.Proteobacter | 1.721812  |       | -         |          | Bacteria.Bacteroidetes.E  | 4.639179  |       | -         |          |
| Bacteria.Proteobacter | 0.93928   |       | -         |          | Bacteria.Proteobacteria.. | 1.722299  |       | -         |          |
| Bacteria.Bacteroidete | 4.061092  |       | -         |          | Bacteria.Firmicutes.Bac   | 3.094269  |       | -         |          |
| Bacteria.Proteobacter | 1.497204  |       | -         |          | Bacteria.Proteobacteria.] | 1.052625  |       | -         |          |
| Bacteria.Firmicutes.E | 3.093499  |       | -         | 0.007049 | Bacteria.Chloroflexi.An   | 0.786825  |       | -         |          |
| Bacteria.Verrucomici  | 0.784121  |       | -         |          | Bacteria.Firmicutes.Bac   | 1.96943   |       | -         |          |
| Bacteria.Firmicutes.E | 1.648369  |       | -         |          | Bacteria.Firmicutes.Erys  | 1.302603  |       | -         |          |
| Bacteria.Proteobacter | 1.362861  |       | -         |          | Bacteria.Proteobacteria.. | 1.724225  |       | -         |          |
| Bacteria.Bacteroidete | 5.106182  |       | -         |          | Bacteria.Bacteroidetes    | 5.226834  |       | -         |          |
| Bacteria.Bacteroidete | 1.17958   |       | -         |          | Bacteria.Bacteroidetes.E  | 2.226822  |       | -         |          |
| Bacteria.Proteobacter | 1.04919   |       | -         |          | Bacteria.Proteobacteria.0 | 1.28323   |       | -         |          |
| Bacteria.Firmicutes.E | 1.663892  |       | -         |          | Bacteria.Firmicutes.Bac   | 2.360936  |       | -         | 0.009484 |
| Bacteria.Proteobacter | 2.131837  |       | -         |          | Bacteria.Firmicutes.Clos  | 4.837937  |       | -         |          |
| Bacteria.Firmicutes.C | 4.750533  |       | -         |          | Bacteria.Firmicutes.Erys  | 4.061645  |       | -         |          |
| Bacteria.Firmicutes.E | 3.97172   |       | -         |          | Bacteria.Firmicutes.Bac   | 5.213592  |       | -         |          |
| Bacteria.Firmicutes.E | 5.037751  |       | -         |          | Bacteria.Bacteroidetes.F  | 2.460334  |       | -         | 0.002594 |

|                       |          |     |          |          |                           |          |      |                   |
|-----------------------|----------|-----|----------|----------|---------------------------|----------|------|-------------------|
| Bacteria.Bacteroidete | 2.413436 | WM  | 3.061766 | 0.005557 | Bacteria.Chloroflexi.An   | 0.941669 | -    |                   |
| Bacteria.Fusobacteria | 2.29202  |     | -        |          | Bacteria.Bacteroidetes._  | 1.311426 | -    |                   |
| Bacteria.Bacteroidete | 1.509739 |     | -        |          | Bacteria.Bacteroidetes.E  | 0.832429 | -    |                   |
| Bacteria.Bacteroidete | 0.786538 |     | -        |          | Bacteria.Firmicutes.Bac   | 0.981936 | -    |                   |
| Bacteria.Chloroflexi. | 1.003777 |     | -        |          | Bacteria.Actinobacteria.  | 2.288555 | -    |                   |
| Bacteria.Actinobacte  | 2.282665 |     | -        |          | Bacteria.Firmicutes.Clos  | 2.9175   | -    |                   |
| Bacteria.Proteobacter | 0.833801 |     | -        |          | Bacteria.Bacteroidetes.E  | 3.386152 | -    |                   |
| Bacteria.Firmicutes.C | 1.304806 |     | -        |          | Bacteria.Bacteroidetes._  | 0.89258  | -    |                   |
| Bacteria.Firmicutes.C | 1.246325 |     | -        |          | Bacteria.Proteobacteria.] | 0.981936 | -    |                   |
| Bacteria.Bacteroidete | 3.372918 |     | -        |          | Bacteria.Bacteroidetes.S  | 0.893408 | -    |                   |
| Bacteria.Actinobacte  | 0.897793 |     | -        |          | Bacteria.Proteobacteria.] | 1.158028 | -    |                   |
| Bacteria.Firmicutes.C | 1.304806 |     | -        |          | Bacteria.Verrucomicrob    | 1.087855 | -    |                   |
| Bacteria.Verrucomici  | 1.256068 |     | -        |          | Bacteria.Proteobacteria.] | 1.754108 | -    |                   |
| Bacteria.Proteobacter | 1.627878 |     | -        |          | Bacteria.OD1              | 1.383743 | -    |                   |
| Bacteria.OD1          | 1.299381 |     | -        |          | Bacteria.Deferribacteres  | 1.670867 | -    |                   |
| Bacteria.Deferribacte | 1.583806 |     | -        |          | Bacteria.Proteobacteria.† | 3.382306 | HFFD | 3.023945 0.002924 |
| Bacteria.Proteobacter | 3.296825 |     | -        |          | Bacteria.Proteobacteria.] | 1.587693 | -    |                   |
| Bacteria.Actinobacte  | 1.467883 |     | -        |          | Bacteria.Proteobacteria.† | 1.72487  | -    |                   |
| Bacteria.Proteobacter | 1.132723 |     | -        |          | Bacteria.Bacteroidetes.E  | 2.569609 | -    | 0.006234          |
| Bacteria.Actinobacte  | 0.976814 |     | -        |          | Bacteria.Bacteroidetes.E  | 2.271947 | -    |                   |
| Bacteria.Bacteroidete | 1.310923 |     | -        |          | Bacteria.Firmicutes.Clos  | 0.887235 | -    |                   |
| Bacteria.Bacteroidete | 2.16188  |     | -        |          | Bacteria.Proteobacteria.. | 1.793522 | -    |                   |
| Bacteria.Proteobacter | 1.438832 |     | -        |          | Bacteria.Bacteroidetes.E  | 0.881534 | -    |                   |
| Bacteria.Firmicutes.C | 4.6185   |     | -        |          | Bacteria.Firmicutes.Clos  | 4.712825 | -    |                   |
| Bacteria.Proteobacter | 3.029089 | CAP | 3.07488  | 0.007715 | Bacteria.Proteobacteria.. | 3.055506 | -    | 0.017586          |
| Bacteria.Planctomyce  | 0.960213 |     | -        |          | Bacteria.Proteobacteria.. | 2.458787 | -    |                   |
| Bacteria.Proteobacter | 2.244867 |     | -        |          | Bacteria.Proteobacteria.] | 4.14664  | CAP  | 3.955033 0.004891 |
| Bacteria.Proteobacter | 4.413987 |     | -        |          | Bacteria._Thermi_.Dein    | 1.845864 | -    |                   |
| Bacteria._Thermi_.D   | 1.496524 |     | -        |          | Bacteria.Proteobacteria.] | 1.937713 | -    |                   |
| Bacteria.Proteobacter | 2.065465 |     | -        |          | Bacteria.Proteobacteria.] | 0.997022 | -    |                   |
| Bacteria.Proteobacter | 1.131365 |     | -        |          | Bacteria.Proteobacteria.] | 3.486216 | WM   | 3.013304 0.015271 |
| Bacteria.Proteobacter | 3.280547 | CAP | 3.044179 | 0.021068 | Bacteria.Proteobacteria.† | 0.871814 | -    |                   |
| Bacteria.Proteobacter | 0.724788 |     | -        |          | Bacteria.Chlamydiae.Ch    | 0.820931 | -    |                   |

|                        |              |          |          |                            |          |          |
|------------------------|--------------|----------|----------|----------------------------|----------|----------|
| Bacteria.Chlamydiae.   | 0.715946     | -        |          | Bacteria.SR1               | 0.93436  | -        |
| Bacteria.Cyanobacter   | 2.661017 CAP | 3.267236 | 0.004095 | Bacteria.Cyanobacteria     | 2.47046  | -        |
| Bacteria.Proteobacter  | 2.139979 ND  | 3.21975  | 0.023069 | Bacteria.Proteobacteria.]  | 2.194125 | -        |
| Bacteria.Chlamydiae.   | 0.715946     | -        |          | Bacteria.Chlamydiae.Ch     | 0.820931 | -        |
| Bacteria.Firmicutes.E  | 0.778946     | -        |          | Bacteria.Actinobacteria..  | 0.981936 | -        |
| Bacteria.Chloroflexi.' | 0.967542     | -        |          | Bacteria.Firmicutes.Bac    | 1.566573 | -        |
| Bacteria.Deferribacte  | 1.583806     | -        |          | Bacteria.Proteobacteria.() | 1.092112 | -        |
| Bacteria.Firmicutes.E  | 0.955037     | -        |          | Bacteria.Deferribacteres   | 1.670867 | -        |
| Bacteria.Cyanobacter   | 1.369803     | -        |          | Bacteria.Actinobacteria..  | 1.186319 | -        |
| Bacteria.Firmicutes.C  | 1.47219      | -        |          | Bacteria.Firmicutes.Bac    | 0.904663 | -        |
| Bacteria.Firmicutes.C  | 0.827686     | -        |          | Bacteria.Cyanobacteria.]   | 1.485779 | -        |
| Bacteria.Proteobacter  | 0.827686     | -        |          | Bacteria.Proteobacteria..  | 0.680906 | -        |
| Bacteria.Proteobacter  | 0.767743     | -        |          | Bacteria.Verrucomicrob     | 4.717493 | -        |
| Bacteria.Verrucomici   | 4.381741     | -        |          | Bacteria._Thermi_.Dein     | 1.802901 | -        |
| Bacteria._Thermi_.D    | 1.496524     | -        |          | Bacteria.Firmicutes.Bac    | 2.01724  | -        |
| Bacteria.Firmicutes.E  | 1.522866     | -        |          | Bacteria.Proteobacteria.() | 0.820931 | -        |
| Bacteria.Proteobacter  | 0.715946     | -        |          | Bacteria.Proteobacteria..  | 2.042195 | -        |
| Bacteria.Proteobacter  | 1.923525     | -        |          | Bacteria.Bacteroidetes.E   | 5.020158 | -        |
| Bacteria.Bacteroidete  | 5.080578     | -        |          | Bacteria.Proteobacteria.]  | 1.701328 | -        |
| Bacteria.Proteobacter  | 1.198823     | -        |          | Bacteria.Cyanobacteria.()  | 1.95555  | -        |
| Bacteria.Cyanobacter   | 1.71477      | -        |          | Bacteria.Proteobacteria..  | 1.232568 | -        |
| Bacteria.Proteobacter  | 1.6059       | -        |          | Bacteria.Proteobacteria..  | 1.935716 | -        |
| Bacteria.Proteobacter  | 1.390442     | -        |          | Bacteria.Fusobacteria.Fu   | 2.522148 | -        |
| Bacteria.Fusobacteria  | 2.384118     |          | 0.04236  | Bacteria.Bacteroidetes.E   | 4.370612 | -        |
| Bacteria.Bacteroidete  | 4.327006 CAP | 3.961164 | 0.017005 | Bacteria.Proteobacteria.() | 2.62231  | -        |
| Bacteria.Cyanobacter   | 2.533028 CAP | 3.075831 | 0.006455 | Bacteria.Nitrospirae.Nitu  | 1.667196 | -        |
| Bacteria.Proteobacter  | 2.561643     | -        |          | Bacteria.Proteobacteria.() | 2.61269  | -        |
| Bacteria.Nitrospirae.l | 1.6059       | -        |          | Bacteria.Chloroflexi.Chl   | 1.172844 | -        |
| Bacteria.Proteobacter  | 2.497455     | -        |          | Bacteria.Firmicutes.Bac    | 1.431303 | -        |
| Bacteria.Bacteroidete  | 0.778617     | -        |          | Bacteria.Cyanobacteria.()  | 0.856229 | -        |
| Bacteria.Chloroflexi.' | 1.121387     | -        |          | Bacteria.Actinobacteria..  | 1.542927 | 0.024104 |
| Bacteria.Cyanobacter   | 0.767743     | -        |          | Bacteria.Proteobacteria.]  | 2.205647 | -        |
| Bacteria.Proteobacter  | 1.598509     | -        |          | Bacteria.Firmicutes.Clos   | 1.540445 | -        |

|                        |          |   |                           |          |     |          |          |
|------------------------|----------|---|---------------------------|----------|-----|----------|----------|
| Bacteria.Proteobacter  | 1.985228 | - | Bacteria.Firmicutes.Bac   | 2.063669 | -   |          |          |
| Bacteria.Firmicutes.C  | 0.945295 | - | Bacteria.Firmicutes.Erys  | 4.102865 | -   |          |          |
| Bacteria.Firmicutes.E  | 1.598509 | - | Bacteria.Proteobacteria.. | 1.732972 | -   |          |          |
| Bacteria.Firmicutes.E  | 3.977774 | - | Bacteria.Proteobacteria.0 | 1.104279 | -   |          |          |
| Bacteria.Proteobacter  | 1.487681 | - | Bacteria.Proteobacteria.] | 0.881534 | -   |          |          |
| Bacteria.Proteobacter  | 1.210546 | - | Bacteria.Bacteroidetes.E  | 2.856195 | -   |          |          |
| Bacteria.Bacteroidete  | 3.278844 | - | Bacteria.Acidobacteria._  | 1.42716  | -   |          |          |
| Bacteria.Planctomyce   | 0.960213 | - | Bacteria.Firmicutes.Clos  | 3.358442 | CAP | 3.108894 | 0.045568 |
| Bacteria.Proteobacter  | 0.786538 | - | Bacteria.Actinobacteria.. | 4.93267  | -   |          |          |
| Bacteria.Acidobacter   | 1.494362 | - | Bacteria.Proteobacteria.] | 1.473076 | -   |          |          |
| Bacteria.Firmicutes.C  | 2.858651 | - | Bacteria.Firmicutes.Bac   | 2.98465  | -   |          |          |
| Bacteria.Actinobacte   | 4.953639 | - | Bacteria.Actinobacteria.. | 1.186319 | -   |          |          |
| Bacteria.Proteobacter  | 1.386639 | - | Bacteria.Nitrospirae.Nit  | 1.667196 | -   |          |          |
| Bacteria.Firmicutes.E  | 1.121387 | - | Bacteria.Proteobacteria.] | 1.158028 | -   |          |          |
| Bacteria.Firmicutes.E  | 2.941735 | - | Bacteria.Bacteroidetes.E  | 1.230368 | -   |          |          |
| Bacteria.Acidobacter   | 0.715946 | - | Bacteria.Proteobacteria.] | 1.587693 | -   |          |          |
| Bacteria.Nitrospirae.l | 1.6059   | - | Bacteria.OD1.SM2F11       | 0.856229 | -   |          |          |
| Bacteria.Proteobacter  | 0.721702 | - | Bacteria.Proteobacteria.] | 1.485738 | -   |          |          |
| Bacteria.WS6           | 1.17098  | - | Bacteria.Bacteroidetes.F  | 2.130925 | -   |          | 0.008307 |
| Bacteria.Chloroflexi.. | 0.778617 | - | Bacteria.Acidobacteria.S  | 1.040453 | -   |          |          |
| Bacteria.Proteobacter  | 1.132723 | - | Bacteria.Firmicutes.Clos  | 1.717577 | -   |          |          |
| Bacteria.Proteobacter  | 1.569602 | - | Bacteria.Proteobacteria.] | 0.819863 | -   |          |          |
| Bacteria.Proteobacter  | 1.547556 | - | Bacteria.Actinobacteria.. | 3.642891 | CAP | 3.286471 | 0.007302 |
| Bacteria.Bacteroidete  | 1.80605  | - | Bacteria.Proteobacteria.0 | 2.807568 | -   |          |          |
| Bacteria.Firmicutes.C  | 1.802982 | - | Bacteria.Actinobacteria.. | 3.060104 | -   |          | 0.024104 |
| Bacteria.Proteobacter  | 2.710712 | - | Bacteria.Firmicutes.Bac   | 2.168815 | -   |          |          |
| Bacteria.Actinobacte   | 1.949502 | - | Bacteria.Spirochaetes.Sp  | 1.435504 | -   |          |          |
| Bacteria.Firmicutes.E  | 3.259984 | - | Bacteria.Proteobacteria.] | 0.786172 | -   |          |          |
| Bacteria.Spirochaetes  | 1.292674 | - | Bacteria.Actinobacteria.. | 2.816125 | -   |          | 0.047002 |
| Bacteria.Proteobacter  | 0.778946 | - | Bacteria.Acidobacteria./  | 0.997022 | -   |          |          |
| Bacteria.Actinobacte   | 2.696266 | - | Bacteria.Firmicutes.Clos  | 0.887235 | -   |          |          |
| Bacteria.Firmicutes.C  | 1.745693 | - | Bacteria.Proteobacteria.] | 3.486216 | WM  | 3.012947 | 0.011503 |
| Bacteria.Bacteroidete  | 1.184478 | - | Bacteria.Firmicutes.Clos  | 3.119221 | -   |          | 0.005112 |

|                        |               |          |          |                           |             |          |          |
|------------------------|---------------|----------|----------|---------------------------|-------------|----------|----------|
| Bacteria.Proteobacter  | 3.233525      | -        |          | Bacteria.Firmicutes.Erys  | 1.285174    | -        |          |
| Bacteria.Firmicutes.C  | 2.890352      | -        |          | Bacteria.Actinobacteria.  | 1.263946    | -        |          |
| Bacteria.Proteobacter  | 0.724788      | -        |          | Bacteria.Actinobacteria.  | 1.186047    | -        |          |
| Bacteria.Actinobacte   | 1.646169      | -        |          | Bacteria.Firmicutes.Clos  | 2.319637    | -        |          |
| Bacteria.Actinobacte   | 3.388608      | 0.030827 |          | Bacteria.Firmicutes.Bac   | 0.786825    | -        |          |
| Bacteria.Firmicutes.C  | 2.230444      | -        |          | Bacteria.Spirochaetes     | 1.435504    | -        |          |
| Bacteria.Spirochaetes  | 1.292674      | -        |          | Bacteria.Proteobacteria.] | 2.610837    | 0.007963 |          |
| Bacteria.Proteobacter  | 2.419612      | -        |          | Bacteria.Proteobacteria.] | 1.483594    | -        |          |
| Bacteria.Proteobacter  | 1.578874      | -        |          | Bacteria.Proteobacteria.† | 1.242699    | -        |          |
| Bacteria.Proteobacter  | 1.398073      | -        |          | Bacteria.Actinobacteria.  | 4.932457    | -        |          |
| Bacteria.Actinobacte   | 4.953584      | -        |          | Bacteria.Proteobacteria.] | 3.486216 WM | 3.013303 | 0.015271 |
| Bacteria.Proteobacter  | 3.278992 CAP  | 3.043093 | 0.024258 | Bacteria.Proteobacteria.† | 1.369701    | -        |          |
| Bacteria.Proteobacter  | 1.463009      | -        |          | Bacteria.Proteobacteria.] | 0.834628    | -        |          |
| Bacteria.Proteobacter  | 1.176886      | -        |          | Bacteria.Bacteroidetes.F  | 1.56914     | -        |          |
| Bacteria.Bacteroidete  | 0.976814      | -        |          | Bacteria.Firmicutes.Erys  | 5.861373    | -        |          |
| Bacteria.Firmicutes.E  | 5.877626 HFFD | 5.305743 | 0.003341 | Bacteria.Proteobacteria.] | 1.53642     | -        |          |
| Bacteria.Proteobacter  | 1.06183       | -        |          | Bacteria.Firmicutes.Bac   | 1.348934    | -        |          |
| Bacteria.Proteobacter  | 2.250992      | -        |          | Bacteria.Verrucomicrob    | 4.717493    | -        |          |
| Bacteria.Firmicutes.E  | 1.176557      | -        |          | Bacteria.Chloroflexi.An   | 1.774981    | -        |          |
| Bacteria.Verrucomici   | 4.381741      | -        |          | Bacteria.TM7.TM7_3        | 1.900115    | -        |          |
| Bacteria.Chloroflexi.  | 1.433683      | -        |          | Bacteria.TM7.TM7_1        | 1.272418    | -        |          |
| Bacteria.Fusobacteria  | 0.784121      | -        |          | Bacteria.Chloroflexi.An   | 0.795297    | -        |          |
| Bacteria.Chloroflexi.  | 1.59421       | -        |          | Bacteria.Proteobacteria.† | 2.225516    | 0.044197 |          |
| Bacteria.TM7.TM7_3     | 3.091001      | -        |          | Bacteria.Nitrospirae.Nit  | 1.667196    | -        |          |
| Bacteria.TM7.TM7_1     | 1.365482      | -        |          | Bacteria.Firmicutes.Clos  | 3.628493    | -        |          |
| Bacteria.Proteobacter  | 2.139908      | -        |          | Bacteria.Spirochaetes.Sp  | 1.435504    | -        |          |
| Bacteria.Nitrospirae.] | 1.6059        | -        |          | Bacteria.Verrucomicrob    | 4.718935    | -        |          |
| Bacteria.Firmicutes.C  | 3.305201      | -        |          | Bacteria.TM7.TM7_3.C      | 1.900115    | -        |          |
| Bacteria.Spirochaetes  | 1.292674      | -        |          | Bacteria.Chlorobi.Ignavi  | 1.478429    | -        |          |
| Bacteria.Verrucomici   | 4.382082      | -        |          | Bacteria.Proteobacteria.. | 3.463794    | -        |          |
| Bacteria.TM7.TM7_3     | 3.091001      | -        |          | Bacteria.Proteobacteria.] | 4.025671    | -        |          |
| Bacteria.Firmicutes.C  | 0.786538      | -        |          | Bacteria.Bacteroidetes.E  | 2.747275    | 0.036348 |          |
| Bacteria.Chlorobi.Igr  | 1.711404      | -        |          | Bacteria.Deferribacteres  | 1.670867    | -        |          |

|                        |          |      |          |                           |                           |          |          |
|------------------------|----------|------|----------|---------------------------|---------------------------|----------|----------|
| Bacteria.Proteobacteri | 2.582506 | -    |          | Bacteria.Verrucomicrob    | 0.820931                  | -        |          |
| Bacteria.Proteobacteri | 4.352382 | -    |          | Bacteria.Firmicutes.Clos  | 1.93436                   | -        |          |
| Bacteria.Bacteroidete  | 2.662056 | WM   | 3.153438 | 0.006455                  | Bacteria.Actinobacteria.  | 0.876533 | -        |
| Bacteria.Deferribacte  | 1.583806 | -    |          | Bacteria.Bacteroidetes.S  | 0.893408                  | -        |          |
| Bacteria.Proteobacteri | 1.04083  | -    |          | Bacteria.Tenericutes.Mc   | 1.962762                  | -        |          |
| Bacteria.Firmicutes.E  | 1.456979 | -    |          | Bacteria.Proteobacteria.] | 1.408429                  | -        |          |
| Bacteria.Tenericutes.  | 1.910662 | -    |          | Bacteria.Cyanobacteria.]  | 1.282966                  | -        |          |
| Bacteria.Proteobacteri | 1.240308 | -    |          | Bacteria.Bacteroidetes.E  | 3.976365                  | CAP      | 3.659797 |
| Bacteria.Proteobacteri | 1.17958  | -    |          | Bacteria._Thermi_         | 1.845864                  | -        | 0.023262 |
| Bacteria.Proteobacteri | 1.554109 | -    |          | Bacteria.Proteobacteria   | 4.393624                  | -        |          |
| Bacteria.Verrucomici   | 4.382082 | -    |          | Bacteria.Proteobacteria.( | 0.795297                  | -        |          |
| Bacteria.Bacteroidete  | 4.061309 | CAP  | 3.747313 | 0.006082                  | Bacteria.Cyanobacteria.]  | 1.485779 | -        |
| Bacteria._Thermi_      | 1.496524 | -    |          | Bacteria.Proteobacteria.( | 1.213829                  | -        |          |
| Bacteria.Proteobacteri | 4.477307 | -    |          | Bacteria.Actinobacteria.  | 0.786825                  | -        |          |
| Bacteria.Firmicutes.E  | 5.877626 | HFFD | 5.328802 | 0.003341                  | Bacteria.Proteobacteria.. | 2.2892   | -        |
| Bacteria.Proteobacteri | 1.128262 | -    |          | Bacteria.Proteobacteria.. | 2.23761                   | -        |          |
| Bacteria.Actinobacte   | 1.022731 | -    |          | Bacteria.Verrucomicrob    | 0.820931                  | -        |          |
| Bacteria.Proteobacteri | 2.032164 | -    |          | Bacteria.Proteobacteria.. | 2.174263                  | -        |          |
| Bacteria.Proteobacteri | 2.251532 | -    |          | Bacteria.Proteobacteria.] | 1.712512                  | -        |          |
| Bacteria.Firmicutes.E  | 2.369425 | -    |          | Bacteria.Proteobacteria.] | 3.797285                  | ND       | 3.482571 |
| Bacteria.Proteobacteri | 2.400071 | CAP  | 3.594709 | 0.006085                  | Bacteria.Firmicutes.Bac   | 3.024202 | 0.038705 |
| Bacteria.Acidobacter   | 0.715946 | -    |          | Bacteria.Chloroflexi      | 1.949943                  | -        | 0.014922 |
| Bacteria.Proteobacteri | 1.650777 | -    |          | Bacteria.Bacteroidetes.E  | 1.068671                  | -        |          |
| Bacteria.Proteobacteri | 1.334668 | -    |          | Bacteria.Bacteroidetes.E  | 2.879042                  | -        | 0.007891 |
| Bacteria.Proteobacteri | 0.892037 | -    |          | Bacteria.Cyanobacteria.]  | 1.485779                  | -        |          |
| Bacteria.Firmicutes.E  | 2.830667 | -    |          | Bacteria.Proteobacteria.. | 2.82277                   | -        |          |
| Bacteria.Chloroflexi   | 1.766901 | -    |          | Bacteria.Chloroflexi.An   | 0.795297                  | -        |          |
| Bacteria.Bacteroidete  | 1.362861 | -    |          | Bacteria.Proteobacteria.( | 1.369701                  | -        |          |
| Bacteria.Bacteroidete  | 2.512406 | -    |          | Bacteria.Proteobacteria.. | 0.820931                  | -        |          |
| Bacteria.Firmicutes.C  | 1.43422  | -    |          | Bacteria.Proteobacteria.( | 1.388764                  | -        |          |
| Bacteria.Firmicutes.C  | 0.721702 | -    |          | Bacteria.Proteobacteria.( | 1.622969                  | -        |          |
| Bacteria.Cyanobacter   | 1.369803 | -    |          | Bacteria.Actinobacteria.  | 0.981936                  | -        |          |
| Bacteria.Proteobacteri | 2.819086 | CAP  | 3.228086 | 0.004851                  | Bacteria.Tenericutes.Mc   | 3.363155 | -        |



|                        |          |     |          |          |                           |          |     |          |          |
|------------------------|----------|-----|----------|----------|---------------------------|----------|-----|----------|----------|
| Bacteria.Firmicutes.E  | 1.818612 | -   |          |          | Bacteria.Acidobacteria./  | 0.997022 | -   |          |          |
| Bacteria.Proteobacteri | 1.463009 | -   |          |          | Bacteria.Firmicutes.Clos  | 2.699836 | -   |          |          |
| Bacteria.Proteobacteri | 1.025818 | -   |          |          | Bacteria.Bacteroidetes.S  | 1.403291 | -   |          |          |
| Bacteria.Verrucomici   | 0.784121 | -   |          |          | Bacteria.Proteobacteria.† | 0.819863 | -   |          |          |
| Bacteria.Proteobacteri | 1.176886 | -   |          |          | Bacteria.Bacteroidetes.E  | 0.786172 | -   |          |          |
| Bacteria.Proteobacteri | 1.36365  | -   |          |          | Bacteria.Actinobacteria.  | 2.085314 | -   |          |          |
| Bacteria.Proteobacteri | 1.723447 | -   |          |          | Bacteria.Proteobacteria.] | 0.881534 | -   |          |          |
| Bacteria.Firmicutes.C  | 1.648472 | -   |          |          | Bacteria.Proteobacteria.† | 1.622969 | -   |          |          |
| Bacteria.Tenericutes.  | 3.662381 | CAP | 3.410476 | 0.004693 | Bacteria.Firmicutes.Clos  | 2.769948 | -   |          |          |
| Bacteria.Acidobacter   | 0.945295 | -   |          |          | Bacteria.Firmicutes.Clos  | 1.408429 | -   |          |          |
| Bacteria.Firmicutes.C  | 2.428713 | -   |          |          | Bacteria.Firmicutes.Clos  | 2.031497 | -   |          |          |
| Bacteria.Firmicutes.C  | 3.34596  | -   |          |          | Bacteria.Firmicutes.Clos  | 1.810152 | -   |          |          |
| Bacteria.Cyanobacter   | 1.369803 | -   |          |          | Bacteria.Fusobacteria.Fu  | 1.218871 | -   |          |          |
| Bacteria.Actinobacteri | 2.086853 | -   |          |          | Bacteria.Bacteroidetes.C  | 1.33335  | -   |          |          |
| Bacteria.Proteobacteri | 1.723447 | -   |          |          | Bacteria.Acidobacteria._  | 1.42716  | -   |          |          |
| Bacteria.Firmicutes.C  | 2.890678 | -   |          |          | Bacteria.Proteobacteria.. | 0.991068 | -   |          |          |
| Bacteria.Firmicutes.C  | 1.422417 | -   |          |          | Bacteria.Proteobacteria.. | 3.653533 | CAP | 3.315457 | 0.01192  |
| Bacteria.Firmicutes.C  | 1.685657 | -   |          |          | Bacteria.Proteobacteria.. | 1.427991 | -   |          |          |
| Bacteria.Firmicutes.C  | 1.437336 | -   |          |          | Bacteria.Firmicutes.Erys  | 1.534886 | -   |          |          |
| Bacteria.Fusobacteria  | 1.085151 | -   |          |          | Bacteria.Proteobacteria.† | 2.268031 | -   |          |          |
| Bacteria.Bacteroidete  | 1.736056 | ND  | 4.235481 | 0.008243 | Bacteria.Chloroflexi.An   | 1.372008 | -   |          |          |
| Bacteria.Acidobacter   | 1.494362 | -   |          |          | Bacteria.Firmicutes.Bac   | 3.277608 | -   |          | 0.006695 |
| Bacteria.Proteobacteri | 3.223898 | -   |          | 0.005518 | Bacteria.Firmicutes.Bac   | 1.15726  | -   |          |          |
| Bacteria.Proteobacteri | 1.513689 | -   |          |          | Bacteria.Proteobacteria.] | 1.627158 | -   |          |          |
| Bacteria.Firmicutes.E  | 1.268572 | -   |          |          | Bacteria.Proteobacteria.] | 3.963121 | ND  | 3.621838 | 0.049351 |
| Bacteria.Actinobacteri | 1.374914 | -   |          |          | Bacteria.Proteobacteria.] | 1.069499 | -   |          |          |
| Bacteria.Chloroflexi.  | 0.945295 | -   |          |          | Bacteria.Armatimonadet    | 0.856229 | -   |          |          |
| Bacteria.Firmicutes.E  | 2.812499 | -   |          | 0.007684 | Bacteria.Proteobacteria.. | 0.928188 | -   |          |          |
| Bacteria.Proteobacteri | 1.627878 | -   |          |          | Bacteria.Bacteroidetes.E  | 1.282966 | -   |          |          |
| Bacteria.Proteobacteri | 3.108135 | -   |          |          | Bacteria.Actinobacteria.  | 3.809471 | -   |          |          |
| Bacteria.Proteobacteri | 1.181592 | -   |          |          | Bacteria.Chloroflexi.An   | 1.199693 | -   |          |          |
| Bacteria.Proteobacteri | 0.800722 | -   |          |          | Bacteria.Armatimonadet    | 0.856229 | -   |          |          |
| Bacteria.Bacteroidete  | 1.438588 | -   |          |          | Bacteria.Firmicutes       | 5.914358 | -   |          |          |

|                       |               |          |          |                           |              |         |          |
|-----------------------|---------------|----------|----------|---------------------------|--------------|---------|----------|
| Bacteria.Actinobacte  | 3.839092 CAP  | 3.423877 | 0.011619 | Bacteria.Proteobacteria.0 | 1.971388     | -       | -        |
| Bacteria.Firmicutes.C | 0.763188      | -        | -        | Bacteria.Firmicutes.Clos  | 2.783071     | -       | -        |
| Bacteria.Chloroflexi. | 0.945295      | -        | -        | Bacteria.Fusobacteria.Fu  | 1.780041     | -       | -        |
| Bacteria.Actinobacte  | 1.17958       | -        | -        | Bacteria.Firmicutes.Bac   | 1.632943     | -       | -        |
| Bacteria.Firmicutes   | 5.934682 HFFD | 5.345445 | 0.003509 | Bacteria.Firmicutes.Clos  | 2.226883     | -       | -        |
| Bacteria.Verrucomici  | 0.784121      | -        | -        | Bacteria.Chlamydiae.Ch    | 0.820931     | -       | -        |
| Bacteria.Firmicutes.C | 2.665166      | -        | -        | Bacteria.Proteobacteria.. | 0.928188     | -       | -        |
| Bacteria.Actinobacte  | 1.467883      | -        | -        | Bacteria.Proteobacteria.] | 0.881534     | -       | -        |
| Bacteria.Fibrobactere | 0.93928       | -        | -        | Bacteria.Firmicutes.Clos  | 4.378355 CAP | 4.0487  | 0.022894 |
| Bacteria.Proteobacter | 0.827686      | -        | -        | Bacteria.Bacteroidetes.E  | 3.591328 WM  | 3.24797 | 0.021904 |
| Bacteria.Firmicutes.C | 2.205524      | -        | -        | Bacteria.Proteobacteria.0 | 1.941965     | -       | -        |
| Bacteria.Chlamydiae.  | 0.715946      | -        | -        | Bacteria.Firmicutes.Bac   | 0.832429     | -       | -        |
| Bacteria.Proteobacter | 0.800722      | -        | -        | Bacteria.Proteobacteria.0 | 0.795297     | -       | -        |
| Bacteria.Firmicutes.C | 4.811914      | -        | -        | Bacteria._Thermi_.Dein    | 1.802901     | -       | -        |
| Bacteria.Bacteroidete | 3.0839        | -        | -        | Bacteria.Proteobacteria.0 | 1.936193     | -       | -        |
| Bacteria.Proteobacter | 1.693114      | -        | -        | Bacteria.Actinobacteria.. | 2.327576     | -       | 0.006455 |
| Bacteria.Firmicutes.E | 1.393046      | -        | -        | Bacteria.Proteobacteria.] | 0.786172     | -       | -        |
| Bacteria.Proteobacter | 1.04083       | -        | -        | Bacteria.Bacteroidetes._  | 1.462755     | -       | 0.024104 |
| Bacteria._Thermi_.D   | 1.496524      | -        | -        | Bacteria.Proteobacteria.] | 1.712512     | -       | -        |
| Bacteria.Proteobacter | 1.463009      | -        | -        | Bacteria.Proteobacteria.] | 1.11776      | -       | -        |
| Bacteria.Actinobacte  | 2.039623      | -        | -        | Bacteria.Chlamydiae       | 0.820931     | -       | -        |
| Bacteria.Proteobacter | 0.778946      | -        | -        | Bacteria.Bacteroidetes.F  | 2.544619     | -       | -        |
| Bacteria.Bacteroidete | 1.58983       | -        | -        | Bacteria.Cyanobacteria.]  | 0.885289     | -       | -        |
| Bacteria.Proteobacter | 1.528932      | -        | -        | Bacteria.Firmicutes.Erys  | 5.861373     | -       | -        |
| Bacteria.Chlamydiae   | 0.715946      | -        | -        | Bacteria.Bacteroidetes.E  | 2.17257      | -       | -        |
| Bacteria.Bacteroidete | 2.506179      | -        | -        | Bacteria.Actinobacteria.. | 1.434489     | -       | -        |
| Bacteria.Bacteroidete | 2.455602 WM   | 3.333467 | 0.030888 | Bacteria.Proteobacteria.] | 1.052625     | -       | -        |
| Bacteria.Proteobacter | 3.296825      | -        | -        | Bacteria.Firmicutes.Bac   | 2.194474     | -       | -        |
| Bacteria.Firmicutes.E | 1.533117      | -        | -        | Bacteria.Deferribacteres  | 1.670867     | -       | -        |
| Bacteria.Deferribacte | 1.583806      | -        | -        | Bacteria.Actinobacteria.. | 4.93267      | -       | -        |
| Bacteria.Actinobacte  | 4.953639      | -        | -        | Bacteria.TM7.TM7_3.C      | 1.900115     | -       | -        |
| Bacteria.TM7.TM7_     | 3.091001      | -        | -        | Bacteria.Proteobacteria.0 | 0.876533     | -       | -        |
| Bacteria.Bacteroidete | 1.862273      | -        | -        | Bacteria.Bacteroidetes._  | 1.686275     | -       | -        |

|                        |               |          |          |                           |              |          |          |
|------------------------|---------------|----------|----------|---------------------------|--------------|----------|----------|
| Bacteria.Actinobacte   | 5.436771 ND   | 5.165053 | 0.013284 | Bacteria.Actinobacteria.  | 2.022504     | -        |          |
| Bacteria.WS6.SC72      | 1.17098       | -        |          | Bacteria.Actinobacteria.  | 4.936317     | -        |          |
| Bacteria.Actinobacte   | 1.048765      | -        |          | Bacteria.Actinobacteria.  | 1.186047     | -        |          |
| Bacteria.Proteobacte   | 1.799859      | -        |          | Bacteria.Proteobacteria.] | 4.038988     | -        |          |
| Bacteria.Proteobacte   | 4.360362      | -        |          | Bacteria.Nitrospirae      | 1.667196     | -        |          |
| Bacteria.Firmicutes.C  | 3.155739 WM   | 3.021746 | 0.009342 | Bacteria.Firmicutes.Clos  | 2.625762     | -        |          |
| Bacteria.Bacteroidete  | 1.184478      | -        |          | Bacteria.Fusobacteria.Fu  | 2.424356     | -        |          |
| Bacteria.Gemmatimo     | 0.752123      | -        |          | Bacteria.Bacteroidetes.S  | 1.242699     | -        |          |
| Bacteria.Proteobacte   | 0.892037      | -        |          | Bacteria.Fusobacteria.Fu  | 0.904663     | -        |          |
| Bacteria.Proteobacte   | 4.416852      | -        |          | Bacteria.Gemmatimonac     | 0.89258      | -        |          |
| Bacteria.Actinobacte   | 0.657709      | -        |          | Bacteria.Acidobacteria.i  | 1.063326     | -        |          |
| Bacteria.Actinobacte   | 1.277842      | -        |          | Bacteria.Proteobacteria.] | 4.149683 CAP | 3.957183 | 0.004327 |
| Bacteria.Firmicutes.C  | 1.422417      | -        |          | Bacteria.Firmicutes.Clos  | 1.408429     | -        |          |
| Bacteria.Bacteroidete  | 3.346217      | -        |          | Bacteria.Bacteroidetes.E  | 3.444665     | -        |          |
| Bacteria.Proteobacte   | 1.31827 ND    | 4.415441 | 0.024104 | Bacteria.Proteobacteria.] | 1.158028     | -        |          |
| Bacteria.Nitrospirae.l | 1.6059        | -        |          | Bacteria.Proteobacteria.] | 1.158028     | -        |          |
| Bacteria.Proteobacte   | 1.650777      | -        |          | Bacteria.Nitrospirae.Nit  | 1.667196     | -        |          |
| Bacteria.Firmicutes.C  | 1.259769      | -        |          | Bacteria.Proteobacteria.] | 1.712512     | -        |          |
| Bacteria.Bacteroidete  | 1.948039 ND   | 3.767496 | 0.002009 | Bacteria.Proteobacteria.] | 1.864639     | -        |          |
| Bacteria.Chloroflexi.' | 0.800722      | -        |          | Bacteria.Firmicutes.Clos  | 1.262301     | -        |          |
| Bacteria.Bacteroidete  | 2.601545      | -        |          | Bacteria.Bacteroidetes.F  | 2.344578     | -        | 0.00759  |
| Bacteria.Firmicutes.C  | 3.435723      | -        |          | Bacteria.Bacteroidetes.C  | 1.586387     | -        |          |
| Bacteria.Bacteroidete  | 1.902585 ND   | 3.613226 | 0.002009 | Bacteria.Chloroflexi.The  | 0.995954     | -        |          |
| Bacteria.Proteobacte   | 1.721812      | -        |          | Bacteria.Bacteroidetes.E  | 3.203291     | -        |          |
| Bacteria.Proteobacte   | 1.025818      | -        |          | Bacteria.Firmicutes.Clos  | 3.356216     | -        | 0.014029 |
| Bacteria.Proteobacte   | 2.845672 ND   | 3.146836 | 0.007344 | Bacteria.Bacteroidetes.C  | 1.586387     | -        |          |
| Bacteria.Firmicutes.E  | 5.877626 HFFD | 5.319673 | 0.003341 | Bacteria.Proteobacteria.] | 1.64643      | -        |          |
| Bacteria.Bacteroidete  | 1.494362      | -        |          | Bacteria.Actinobacteria.  | 1.686359     | -        |          |
| Bacteria.Firmicutes.E  | 1.802628      | -        |          | Bacteria.Bacteroidetes.E  | 1.721426     | -        |          |
| Bacteria.Proteobacte   | 1.176886      | -        |          | Bacteria.Firmicutes.Bac   | 2.242137     | -        |          |
| Bacteria.Actinobacte   | 1.229242      | -        |          | Bacteria.Proteobacteria.] | 1.545792     | -        |          |
| Bacteria.Firmicutes.E  | 1.268572      | -        |          | Bacteria.Actinobacteria.  | 1.186319     | -        |          |
| Bacteria.Actinobacte   | 1.150062      | -        |          | Bacteria.Actinobacteria.  | 0.928188     | -        |          |

|                        |          |      |          |          |                           |          |      |          |          |
|------------------------|----------|------|----------|----------|---------------------------|----------|------|----------|----------|
| Bacteria.Proteobacteri | 1.198662 | -    |          |          | Bacteria.Firmicutes.Bac   | 1.230368 | -    |          |          |
| Bacteria.Proteobacteri | 3.40448  | -    |          |          | Bacteria.Actinobacteria.  | 0.962263 | -    |          |          |
| Bacteria.Actinobacteri | 4.954437 | -    |          |          | Bacteria.Proteobacteria.0 | 1.941526 | -    |          |          |
| Bacteria.Proteobacteri | 1.645297 | -    |          |          | Bacteria.Proteobacteria.0 | 3.494015 | HFFD | 3.090538 | 0.00573  |
| Bacteria.Firmicutes.E  | 1.121387 | -    |          |          | Bacteria.Chloroflexi.Elli | 1.167159 | -    |          |          |
| Bacteria.Proteobacteri | 0.666513 | -    |          |          | Bacteria.Actinobacteria.  | 4.935678 | -    |          |          |
| Bacteria.Chlorobi.Igr  | 1.711404 | -    |          |          | Bacteria.Firmicutes.Erys  | 1.11776  | -    |          |          |
| Bacteria.Firmicutes.C  | 1.014673 | -    |          |          | Bacteria.Proteobacteria.0 | 1.086189 | -    |          |          |
| Bacteria.Proteobacteri | 0.721702 | -    |          |          | Bacteria.Chlorobi.Ignavi  | 1.478429 | -    |          |          |
| Bacteria._Thermi_.D    | 1.496524 | -    |          |          | Bacteria.Armatimonadet    | 0.856229 | -    |          |          |
| Bacteria.Firmicutes.C  | 1.504131 | -    |          |          | Bacteria.Acidobacteria.i  | 1.063326 | -    |          |          |
| Bacteria.Firmicutes.E  | 0.962629 | -    |          |          | Bacteria._Thermi_.Dein    | 1.802901 | -    |          |          |
| Bacteria.Acidobacter   | 1.105029 | -    |          |          | Bacteria.Firmicutes.Clos  | 2.213071 | -    |          |          |
| Bacteria.Acidobacter   | 1.6024   | -    |          |          | Bacteria.Acidobacteria    | 1.564329 | -    |          |          |
| Bacteria.Firmicutes.C  | 1.343235 | -    |          |          | Bacteria.Proteobacteria.. | 0.876533 | -    |          |          |
| Bacteria.Proteobacteri | 0.937682 | -    |          |          | Bacteria.Proteobacteria.] | 0.881534 | -    |          |          |
| Bacteria.Spirochaetes  | 1.292674 | -    |          |          | Bacteria.Proteobacteria.0 | 2.38065  | -    |          |          |
| Bacteria.Actinobacteri | 4.068326 | ND   | 3.814478 | 0.007727 | Bacteria.Proteobacteria.. | 1.135658 | -    |          |          |
| Bacteria.Proteobacteri | 1.003489 | -    |          |          | Bacteria.Spirochaetes.Sp  | 1.435504 | -    |          |          |
| Bacteria.Firmicutes.C  | 1.504131 | -    |          |          | Bacteria.Proteobacteria.] | 1.53642  | -    |          |          |
| Bacteria.Proteobacteri | 1.547556 | -    |          |          | Bacteria.Actinobacteria.  | 3.329293 | -    |          |          |
| Bacteria.Proteobacteri | 2.035525 | -    |          |          | Bacteria.Proteobacteria.0 | 1.379876 | -    |          |          |
| Bacteria.TM7           | 3.091001 | -    |          |          | Bacteria.Firmicutes.Clos  | 2.213071 | -    |          |          |
| Bacteria.Firmicutes.E  | 2.169694 | HFFD | 3.6207   | 0.001069 | Bacteria.Proteobacteria.. | 1.828793 | -    |          |          |
| Bacteria.Firmicutes.C  | 3.507344 | -    |          |          | Bacteria.Proteobacteria.0 | 1.655904 | -    |          |          |
| Bacteria.Fusobacteria  | 2.384118 | -    |          |          | Bacteria.TM7              | 1.9323   | -    |          |          |
| Bacteria.Actinobacteri | 1.160351 | -    |          |          | Bacteria.Actinobacteria.  | 0.928188 | -    |          |          |
| Bacteria.Bacteroidete  | 1.862273 | -    |          |          | Bacteria.Actinobacteria.  | 0.981936 | -    |          |          |
| Bacteria.Fibrobactere  | 0.93928  | -    |          |          | Bacteria.Firmicutes.Clos  | 3.440814 | -    |          |          |
| Bacteria.Proteobacteri | 0.724788 | -    |          |          | Bacteria.Fusobacteria.Fu  | 2.522148 | -    |          |          |
| Bacteria.Bacteroidete  | 1.80605  | -    |          |          | Bacteria.Proteobacteria.0 | 1.408429 | -    |          |          |
| Bacteria.Bacteroidete  | 1.957731 | -    |          |          | Bacteria.Bacteroidetes._  | 1.686275 | -    |          |          |
| Bacteria._Thermi_.D    | 1.168634 | -    |          |          | Bacteria.Proteobacteria.0 | 3.382306 | HFFD | 3.021092 | 0.002924 |

|                       |              |          |          |                           |          |          |
|-----------------------|--------------|----------|----------|---------------------------|----------|----------|
| Bacteria.Cyanobacter  | 0.767743     | -        |          | Bacteria.Bacteroidetes.F  | 2.130925 | 0.008307 |
| Bacteria.Cyanobacter  | 1.71477      | -        |          | Bacteria.Cyanobacteria.]  | 1.282966 | -        |
| Bacteria.Firmicutes.C | 1.839982     | -        |          | Bacteria.Bacteroidetes.E  | 2.485196 | -        |
| Bacteria.Firmicutes.C | 1.014673     | -        |          | Bacteria._Thermi_.Dein    | 0.819863 | -        |
| Bacteria.Actinobacte  | 5.436771 ND  | 5.171253 | 0.013284 | Bacteria.Cyanobacteria.†  | 0.856229 | -        |
| Bacteria.Firmicutes.E | 3.259984     | -        |          | Bacteria.Cyanobacteria.†  | 1.95555  | -        |
| Bacteria.Proteobacter | 1.879553     | -        |          | Bacteria.Firmicutes.Clos  | 1.603539 | -        |
| Bacteria.Proteobacter | 1.802087     | -        |          | Bacteria.Firmicutes.Erys  | 5.861373 | -        |
| Bacteria.Firmicutes.C | 1.906579     | -        |          | Bacteria.Actinobacteria.  | 4.936317 | -        |
| Bacteria.Proteobacter | 1.176886     | -        |          | Bacteria.Actinobacteria.  | 1.068671 | -        |
| Bacteria.Firmicutes.E | 3.259984     | -        |          | Bacteria.Firmicutes.Erys  | 1.695606 | -        |
| Bacteria.Tenericutes. | 1.910662     | -        |          | Bacteria.Firmicutes.Bac   | 2.168815 | -        |
| Bacteria.Tenericutes. | 3.671578 CAP | 3.420834 | 0.005267 | Bacteria.Proteobacteria.† | 1.971388 | -        |
| Bacteria.Fibrobactere | 0.93928      | -        |          | Bacteria.Proteobacteria.† | 2.166788 | -        |
| Bacteria.Proteobacter | 1.578874     | -        |          | Bacteria.Firmicutes.Clos  | 2.101595 | -        |
| Bacteria.Proteobacter | 0.778946     | -        |          | Bacteria.Proteobacteria.. | 0.820931 | -        |
| Bacteria.Actinobacte  | 1.374914     | -        |          | Bacteria.Firmicutes.Bac   | 2.168815 | -        |
| Bacteria.Proteobacter | 0.93928      | -        |          | Bacteria.Tenericutes.Mc   | 1.962762 | -        |
| Bacteria.Proteobacter | 2.340703     | -        |          | Bacteria.Tenericutes.Mc   | 3.364056 | -        |
| Bacteria.Firmicutes.C | 0.752123     | -        |          | Bacteria.Actinobacteria.  | 1.529731 | -        |
| Bacteria.Bacteroidete | 1.897539     | -        |          | Bacteria.Verrucomicrob    | 0.786172 | -        |
| Bacteria.Chloroflexi. | 1.003777     | -        |          | Bacteria.Actinobacteria.  | 1.263946 | -        |
| Bacteria.Proteobacter | 1.390442     | -        |          | Bacteria.Proteobacteria.† | 1.388764 | -        |
| Bacteria.Cyanobacter  | 1.995608     | -        |          | Bacteria.Proteobacteria.† | 2.34822  | -        |
| Bacteria.Firmicutes.C | 2.428713     | -        |          | Bacteria.Firmicutes.Clos  | 1.194438 | -        |
| Bacteria.Firmicutes.C | 2.314699     | -        |          | Bacteria.Armatimonadet    | 0.856229 | -        |
| Bacteria.Firmicutes.C | 1.143634     | -        |          | Bacteria.Proteobacteria.. | 2.047934 | 0.006455 |
| Bacteria.Proteobacter | 1.650777     | -        |          | Bacteria.Bacteroidetes.E  | 1.59884  | 0.024104 |
| Bacteria.Actinobacte  | 2.282665     | -        |          | Bacteria.Bacteroidetes.E  | 0.786172 | -        |
| Bacteria.Actinobacte  | 0.733425     | -        |          | Bacteria.Firmicutes.Bac   | 3.480867 | -        |
| Bacteria.Firmicutes.E | 1.06183      | -        |          | Bacteria.Firmicutes.Clos  | 1.069499 | -        |
| Bacteria.Firmicutes.C | 1.197043     | -        |          | Bacteria.Firmicutes.Clos  | 3.440814 | -        |
| Bacteria.Proteobacter | 1.879553     | -        |          | Bacteria.Proteobacteria.] | 1.712512 | -        |

|                        |              |                   |                           |               |                   |
|------------------------|--------------|-------------------|---------------------------|---------------|-------------------|
| Bacteria.Bacteroidete  | 0.976814     | -                 | Bacteria.Actinobacteria.  | 2.288555      | -                 |
| Bacteria.Proteobacteri | 2.215259     | -                 | Bacteria.Bacteroidetes.E  | 2.19864       | -                 |
| Bacteria.Proteobacteri | 1.131365     | -                 | Bacteria.Firmicutes.Bac   | 1.431303      | -                 |
| Bacteria.Bacteroidete  | 5.105531     | -                 | Bacteria.Bacteroidetes.F  | 1.56914       | -                 |
| Bacteria.Spirochaetes  | 1.292674     | -                 | Bacteria.Proteobacteria.] | 2.399501      | -                 |
| Bacteria.Firmicutes.C  | 1.560799     | -                 | Bacteria.Proteobacteria.] | 0.997022      | -                 |
| Bacteria.Planctomyce   | 0.960213     | -                 | Bacteria.Actinobacteria.  | 0.887235      | -                 |
| Bacteria.Proteobacteri | 1.841728     | -                 | Bacteria.Bacteroidetes.E  | 5.225712      | -                 |
| Bacteria.Proteobacteri | 1.463009     | -                 | Bacteria.Proteobacteria.. | 0.962263      | -                 |
| Bacteria.Bacteroidete  | 1.268572     | -                 | Bacteria.Firmicutes.Clos  | 1.922661      | -                 |
| Bacteria.Actinobacte   | 0.93928      | -                 | Bacteria.Firmicutes.Bac   | 4.272547 HFFD | 3.90471 0.027408  |
| Bacteria.Firmicutes.E  | 1.939985     | -                 | Bacteria.Proteobacteria.† | 2.095052      | -                 |
| Bacteria.Firmicutes.C  | 1.745693     | -                 | Bacteria.Proteobacteria.† | 1.936193      | -                 |
| Bacteria.Firmicutes.C  | 2.54477      | -                 | Bacteria.Bacteroidetes.E  | 1.634261      | 0.024104          |
| Bacteria.Firmicutes.E  | 1.875479     | -                 | Bacteria.Cyanobacteria.†  | 2.122619      | -                 |
| Bacteria.Actinobacte   | 2.325373     | -                 | Bacteria.Actinobacteria.  | 1.691276      | -                 |
| Bacteria.Bacteroidete  | 1.702805     | -                 | Bacteria.Firmicutes.Bac   | 1.962504      | -                 |
| Bacteria.Firmicutes.C  | 1.906579     | -                 | Bacteria.Firmicutes.Clos  | 0.887235      | -                 |
| Bacteria.Firmicutes.E  | 3.096708     | -                 | Bacteria.Tenericutes.Mc   | 2.415527      | 0.024104          |
| Bacteria.Proteobacteri | 1.596417     | -                 | Bacteria.Firmicutes.Clos  | 2.74042       | -                 |
| Bacteria.Proteobacteri | 3.280547 CAP | 3.043793 0.021068 | Bacteria.Actinobacteria.  | 1.186047      | -                 |
| Bacteria.Acidobacter   | 1.105029     | -                 | Bacteria.Firmicutes.Bac   | 2.400488      | -                 |
| Bacteria.Firmicutes.E  | 2.520102 ND  | 3.249851 0.030244 | Bacteria.Proteobacteria.† | 1.864639      | -                 |
| Bacteria.Firmicutes.E  | 5.058381     | -                 | Bacteria.Actinobacteria.  | 2.547613      | 0.039659          |
| Bacteria.Bacteroidete  | 0.786538     | -                 | Bacteria.Bacteroidetes.E  | 1.804683      | -                 |
| Bacteria.Proteobacteri | 0.715946     | -                 | Bacteria.Firmicutes.Clos  | 2.101595      | -                 |
| Bacteria.Proteobacteri | 0.767743     | -                 | Bacteria.Firmicutes.Clos  | 2.721998      | -                 |
| Bacteria.Proteobacteri | 1.483302     | -                 | Bacteria.Proteobacteria.† | 1.36241       | -                 |
| Bacteria.Firmicutes.C  | 3.507344     | -                 | Bacteria.Proteobacteria.] | 3.486216 WM   | 3.013305 0.015271 |
| Bacteria.Firmicutes.C  | 2.032944     | -                 | Bacteria.Verrucomicrob    | 0.786172      | -                 |
| Bacteria.Bacteroidete  | 2.601974     | 0.03633           | Bacteria.Acidobacteria./  | 0.997022      | -                 |
| Bacteria.Tenericutes   | 3.673937 CAP | 3.391187 0.002104 | Bacteria.Bacteroidetes.E  | 0.887235      | -                 |
| Bacteria.Proteobacteri | 0.778946     | -                 | Bacteria.Firmicutes.Bac   | 2.075143      | 0.03645           |

|                        |             |          |          |                           |          |          |
|------------------------|-------------|----------|----------|---------------------------|----------|----------|
| Bacteria.Proteobacteri | 2.123824 ND | 3.217538 | 0.023069 | Bacteria.Firmicutes.Bac   | 5.234737 | -        |
| Bacteria.Proteobacteri | 1.538951    | -        |          | Bacteria.Acidobacteria.S  | 1.040453 | -        |
| Bacteria.Proteobacteri | 1.841728    | -        |          | Bacteria.Actinobacteria.  | 0.856229 | -        |
| Bacteria.Actinobacteri | 1.17958     | -        |          | Bacteria.Firmicutes.Bac   | 1.23539  | -        |
| Bacteria.Proteobacteri | 1.462158    | -        |          | Bacteria.Proteobacteria.. | 0.856229 | -        |
| Bacteria.Firmicutes.E  | 2.840756    | -        |          | Bacteria.Proteobacteria.. | 2.047934 | 0.006455 |
| Bacteria.Bacteroidete  | 1.528859    | -        |          | Bacteria.Firmicutes.Clos  | 1.999409 | -        |
| Bacteria.Proteobacteri | 1.003489    | -        |          | Bacteria.Bacteroidetes.E  | 2.914836 | 0.01789  |
| Bacteria.Firmicutes.C  | 5.308452    | -        |          | Bacteria.Tenericutes      | 3.385123 | -        |
| Bacteria.Firmicutes.C  | 2.605882 ND | 3.291859 | 0.024104 | Bacteria.Proteobacteria.] | 1.11776  | -        |
| Bacteria.Verrucomici   | 1.256068    | -        |          | Bacteria.Proteobacteria.] | 2.194125 | 0.024458 |
| Bacteria.Firmicutes.E  | 2.639275    | -        |          | Bacteria.Proteobacteria.4 | 2.095052 | -        |
| Bacteria.Firmicutes.C  | 1.560799    | -        |          | Bacteria.Chloroflexi.The  | 0.995954 | -        |
| Bacteria.Fusobacteriæ  | 2.131749    | -        |          | Bacteria.Firmicutes.Bac   | 3.027398 | 0.014922 |
| Bacteria.Actinobacteri | 5.436771 ND | 5.155072 | 0.013284 | Bacteria.Bacteroidetes.E  | 1.864735 | -        |
| Bacteria.Firmicutes.E  | 2.071642    | -        |          | Bacteria.Proteobacteria.4 | 1.512935 | -        |
| Bacteria.Acidobacter   | 1.143634    | -        |          | Bacteria.Actinobacteria.  | 1.104279 | -        |
| Bacteria.Firmicutes.C  | 2.277771    | -        |          | Bacteria.Firmicutes.Clos  | 5.211485 | -        |
| Bacteria.Bacteroidete  | 1.957731    | -        |          | Bacteria.Verrucomicrob    | 4.718689 | -        |
| Bacteria.Firmicutes.E  | 2.187567 ND | 3.500022 | 0.007074 | Bacteria.Proteobacteria.. | 0.876533 | -        |
| Bacteria.Firmicutes.E  | 1.393046    | -        |          | Bacteria.Verrucomicrob    | 1.087855 | -        |
| Bacteria.Proteobacteri | 1.335485    | -        |          | Bacteria.Firmicutes.Bac   | 1.661327 | -        |
| Bacteria.Proteobacteri | 0.767743    | -        |          | Bacteria.Firmicutes.Clos  | 1.922661 | -        |
| Bacteria.Proteobacteri | 1.897445    | -        |          | Bacteria.Firmicutes.Bac   | 0.981936 | -        |
| Bacteria.Firmicutes.C  | 1.04397     | -        |          | Bacteria.Actinobacteria.  | 4.936317 | -        |
| Bacteria.Firmicutes.E  | 1.268572    | -        |          | Bacteria.Actinobacteria.  | 1.068671 | -        |
| Bacteria.Tenericutes.  | 1.910662    | -        |          | Bacteria.Firmicutes.Clos  | 1.651582 | -        |
| Bacteria.Bacteroidete  | 1.642167    | -        |          | Bacteria.Firmicutes.Bac   | 2.104102 | -        |
| Bacteria.Bacteroidete  | 1.948039 ND | 3.830756 | 0.002009 | Bacteria.Acidobacteria._  | 1.42716  | -        |
| Bacteria.Actinobacteri | 0.76159     | -        |          | Bacteria.Firmicutes.Clos  | 2.343479 | -        |
| Bacteria.Actinobacteri | 1.569602    | -        |          | Bacteria.Proteobacteria.] | 0.871814 | -        |
| Bacteria.Chlorobi.SJ.  | 1.341624    | -        |          | Bacteria.Actinobacteria.  | 1.186047 | -        |
| Bacteria.Proteobacteri | 2.131837    | -        |          | Bacteria.Firmicutes.Clos  | 1.00852  | -        |

|                       |          |      |                   |                           |          |          |                   |
|-----------------------|----------|------|-------------------|---------------------------|----------|----------|-------------------|
| Bacteria.Bacteroidete | 4.061092 | -    |                   | Bacteria.Bacteroidetes.E  | 2.469612 | -        |                   |
| Bacteria.Actinobacte  | 0.733425 | -    |                   | Bacteria.Firmicutes.Bac   | 1.28839  | -        |                   |
| Bacteria.Bacteroidete | 0.897793 | -    |                   | Bacteria.Proteobacteria.] | 1.61058  | -        |                   |
| Bacteria.Firmicutes.E | 5.874859 | HFFD | 5.314593 0.004359 | Bacteria.Actinobacteria.  | 0.856229 | -        |                   |
| Bacteria.Proteobacter | 2.244867 | -    |                   | Bacteria.Proteobacteria.† | 0.928188 | -        |                   |
| Bacteria.Verrucomici  | 1.160351 | -    |                   | Bacteria.Proteobacteria.† | 2.186721 | 0.006455 |                   |
| Bacteria.Fusobacteriæ | 2.384118 | -    |                   | Bacteria.Firmicutes.Clos  | 1.104279 | -        |                   |
| Bacteria.OD1.ZB2      | 1.270088 | -    |                   | Bacteria.Firmicutes.Bac   | 1.230368 | -        |                   |
| Bacteria._Thermi_.D   | 1.168634 | -    |                   | Bacteria.Proteobacteria.] | 1.158028 | -        |                   |
| Bacteria.Fusobacteriæ | 2.265675 | -    |                   | Bacteria.Tenericutes.Mc   | 1.962762 | -        |                   |
| Bacteria.Firmicutes.E | 3.160483 | -    | 0.009368          | Bacteria.Bacteroidetes._  | 1.686275 | -        |                   |
| Bacteria.Firmicutes.E | 0.778946 | -    |                   | Bacteria.Bacteroidetes.C  | 1.586387 | -        |                   |
| Bacteria.Actinobacte  | 1.897657 | CAP  | 3.532958 0.006776 | Bacteria.Proteobacteria.] | 1.483594 | -        |                   |
| Bacteria.Bacteroidete | 2.506179 | -    |                   | Bacteria.Actinobacteria.  | 1.60705  | -        |                   |
| Bacteria.Actinobacte  | 0.967542 | -    |                   | Bacteria.Proteobacteria.] | 0.881534 | -        |                   |
| Bacteria.Proteobacter | 0.767743 | -    |                   | Bacteria.Proteobacteria.. | 0.928188 | -        |                   |
| Bacteria.Bacteroidete | 0.945295 | -    |                   | Bacteria.Bacteroidetes.E  | 4.639179 | -        |                   |
| Bacteria.Bacteroidete | 2.127386 | -    |                   | Bacteria.Actinobacteria.  | 1.104279 | -        |                   |
| Bacteria.Firmicutes.C | 1.365482 | -    |                   | Bacteria.Proteobacteria.† | 0.928188 | -        |                   |
| Bacteria.Firmicutes.E | 0.477587 | -    |                   | Bacteria.Proteobacteria.] | 1.052625 | -        |                   |
| Bacteria.Firmicutes.C | 0.945295 | -    |                   | Bacteria.Firmicutes.Erys  | 5.853489 | -        |                   |
| Bacteria.Actinobacte  | 0.721702 | -    |                   | Bacteria.Proteobacteria.. | 2.458787 | -        |                   |
| Bacteria.Firmicutes.E | 2.840756 | -    |                   | Bacteria.Verrucomicrob    | 1.263948 | -        |                   |
| Bacteria.Proteobacter | 1.176886 | -    |                   | Bacteria.Fusobacteria.Fu  | 2.522148 | -        |                   |
| Bacteria.Cyanobacter  | 1.71477  | -    |                   | Bacteria._Thermi_.Dein    | 0.819863 | -        |                   |
| Bacteria.Actinobacte  | 1.43586  | -    |                   | Bacteria.Firmicutes.Clos  | 2.149796 | -        |                   |
| Bacteria.Actinobacte  | 1.17958  | -    |                   | Bacteria.Fusobacteria.Fu  | 2.424356 | -        |                   |
| Bacteria.Proteobacter | 2.232125 | -    |                   | Bacteria.Proteobacteria.† | 0.876533 | -        |                   |
| Bacteria.Verrucomici  | 0.784121 | -    |                   | Bacteria.Firmicutes.Bac   | 3.540087 | ND       | 3.151104 0.014495 |
| Bacteria.Fibroactere  | 0.93928  | -    |                   | Bacteria.Firmicutes.Bac   | 0.786172 | -        |                   |
| Bacteria.Proteobacter | 3.190732 | -    |                   | Bacteria.Proteobacteria.] | 0.881534 | -        |                   |
| Bacteria.Proteobacter | 1.717861 | -    |                   | Bacteria.Bacteroidetes.F  | 2.544619 | -        |                   |
| Bacteria.Actinobacte  | 0.967542 | -    |                   | Bacteria.Actinobacteria.  | 1.110452 | -        |                   |



|                        |              |          |          |                           |             |          |          |
|------------------------|--------------|----------|----------|---------------------------|-------------|----------|----------|
| Bacteria.Firmicutes.C  | 0.499692     | -        |          | Bacteria.Spirochaetes.Sp  | 1.435504    | -        |          |
| Bacteria.Chloroflexi.' | 0.967542     | -        |          | Bacteria.Proteobacteria.† | 0.795297    | -        |          |
| Bacteria.GN02          | 1.121387     | -        |          | Bacteria.OD1.ZB2          | 1.230812    | -        |          |
| Bacteria.Bacteroidete  | 2.911659     | -        |          | Bacteria.Bacteroidetes.E  | 2.523117    | -        |          |
| Bacteria.Chlorobi      | 1.865765 CAP | 3.629529 | 0.006455 | Bacteria.Firmicutes.Clos  | 0.5199      | -        |          |
| Bacteria.Bacteroidete  | 5.105531     | -        |          | Bacteria.Bacteroidetes.F  | 1.23539     | -        |          |
| Bacteria.Proteobacter  | 1.596417     | -        |          | Bacteria.Firmicutes.Clos  | 1.540445    | -        |          |
| Bacteria.Bacteroidete  | 2.590525     |          | 0.027904 | Bacteria.Firmicutes.Bac   | 3.027398    |          | 0.014922 |
| Bacteria.Firmicutes.E  | 2.572198     | -        |          | Bacteria.Proteobacteria.] | 3.423512    | -        |          |
| Bacteria.Firmicutes.C  | 1.003489     | -        |          | Bacteria.Proteobacteria.] | 1.545792    | -        |          |
| Bacteria.Proteobacter  | 1.04919      | -        |          | Bacteria.Proteobacteria.] | 3.815528 ND | 3.466692 | 0.04059  |
| Bacteria.Firmicutes.E  | 3.925052 ND  | 3.612862 | 0.027581 | Bacteria.Cyanobacteria.†  | 1.95555     | -        |          |
| Bacteria.Firmicutes.C  | 0.499692     | -        |          | Bacteria.Proteobacteria.† | 3.00762     |          | 0.005676 |
| Bacteria.Firmicutes.C  | 3.091214     | -        |          | Bacteria.Proteobacteria.] | 0.893408    | -        |          |
| Bacteria.Tenericutes.  | 2.811988     | -        |          | Bacteria.Proteobacteria.. | 2.23761     | -        |          |
| Bacteria.Fusobacteria  | 0.938502     | -        |          | Bacteria.Firmicutes.Bac   | 0.991068    | -        |          |
| Bacteria.Actinobacte   | 1.599452     | -        |          | Bacteria.Proteobacteria.. | 1.172844    | -        |          |
| Bacteria.Proteobacter  | 2.721381     | -        |          | Bacteria.Firmicutes.Bac   | 0.832429    | -        |          |
| Bacteria.Bacteroidete  | 1.17958      | -        |          | Bacteria.Actinobacteria.  | 0.786825    | -        |          |
| Bacteria.Firmicutes.C  | 3.387956     | -        |          | Bacteria.Proteobacteria.] | 1.53642     | -        |          |
| Bacteria.Firmicutes.E  | 5.04707      | -        |          | Bacteria.Verrucomicrob    | 4.718689    | -        |          |
| Bacteria.Firmicutes.E  | 1.06183      | -        |          | Bacteria.Bacteroidetes._  | 0.89258     | -        |          |
| Bacteria.Actinobacte   | 1.063441     | -        |          | Bacteria.Proteobacteria.. | 1.547037    | -        |          |
| Bacteria.Bacteroidete  | 0.967542     | -        |          | Bacteria.Actinobacteria.  | 1.110452    | -        |          |
| Bacteria.Actinobacte   | 0.719054     | -        |          | Bacteria.Firmicutes.Clos  | 1.194438    | -        |          |
| Bacteria.Deferribacte  | 1.583806     | -        |          | Bacteria.Actinobacteria.  | 1.686359    | -        |          |
| Bacteria.Chloroflexi.. | 0.693859     | -        |          | Bacteria.Bacteroidetes.E  | 3.406092    | -        |          |
| Bacteria.Cyanobacter   | 2.587136     | -        |          | Bacteria.Chlorobi         | 1.478429    | -        |          |
| Bacteria.WS6.SC72.1    | 1.17098      | -        |          | Bacteria.Bacteroidetes.E  | 5.225712    | -        |          |
| Bacteria.Verrucomici   | 0.827686     | -        |          | Bacteria.Proteobacteria.† | 1.36241     | -        |          |
| Bacteria.Chloroflexi.. | 1.003777     | -        |          | Bacteria.Bacteroidetes.E  | 2.901452    |          | 0.021147 |
| Bacteria.Fusobacteri   | 0.784121     | -        |          | Bacteria.Firmicutes.Clos  | 1.632943    | -        |          |
| Bacteria.Gemmatimo     | 0.752123     | -        |          | Bacteria.Firmicutes.Bac   | 1.661327    | -        |          |

|                       |              |          |          |                           |             |          |          |
|-----------------------|--------------|----------|----------|---------------------------|-------------|----------|----------|
| Bacteria.Proteobacter | 1.335485     | -        |          | Bacteria.Proteobacteria.4 | 1.28323     | -        |          |
| Bacteria.Firmicutes.E | 5.039359     | -        |          | Bacteria.Proteobacteria.] | 2.205647    | -        |          |
| Bacteria.Proteobacter | 4.413987     | -        |          | Bacteria.Firmicutes.Clos  | 1.194438    | -        |          |
| Bacteria.Firmicutes.E | 0.721702     | -        |          | Bacteria.Firmicutes.Clos  | 2.698181    | -        |          |
| Bacteria.Proteobacter | 1.466126     | -        |          | Bacteria.Tenericutes.CK   | 2.951401    | -        |          |
| Bacteria.Firmicutes.E | 3.546104 ND  | 3.300941 | 0.004263 | Bacteria.Proteobacteria.. | 0.893408    | -        |          |
| Bacteria.Bacteroidete | 3.154906     | -        |          | Bacteria.Bacteroidetes.E  | 2.226822    | -        |          |
| Bacteria.Proteobacter | 2.146999     | -        |          | Bacteria.Firmicutes.Clos  | 3.377743    | -        |          |
| Bacteria.GN02.BD1_    | 1.121387     | -        |          | Bacteria.Firmicutes.Bac   | 5.219839    | -        |          |
| Bacteria.Firmicutes.C | 2.381253     | -        |          | Bacteria.Firmicutes.Bac   | 1.431303    | -        |          |
| Bacteria.Proteobacter | 1.101752     | -        |          | Bacteria.Actinobacteria.. | 1.431303    | -        |          |
| Bacteria.Chlamydiae.  | 0.715946     | -        |          | Bacteria.Cyanobacteria.4  | 2.122619    | -        |          |
| Bacteria.Firmicutes.C | 2.837306 ND  | 3.043167 | 0.00794  | Bacteria.Actinobacteria.  | 0.876533    | -        |          |
| Bacteria.Verrucomici  | 1.256068     | -        |          | Bacteria.Proteobacteria.] | 1.61058     | -        |          |
| Bacteria.Verrucomici  | 4.382082     | -        |          | Bacteria.Gemmatimonac     | 0.89258     | -        |          |
| Bacteria.Firmicutes.E | 2.235151     | -        |          | Bacteria.Firmicutes.Bac   | 5.215083    | -        |          |
| Bacteria.Actinobacte  | 1.43586      | -        |          | Bacteria.Proteobacteria.] | 4.14664 CAP | 3.955031 | 0.004891 |
| Bacteria.Fusobacteria | 2.384118     | -        |          | Bacteria.Firmicutes.Bac   | 1.188264    | -        |          |
| Bacteria.Firmicutes.C | 5.308452     | -        |          | Bacteria.Proteobacteria.4 | 1.104279    | -        |          |
| Bacteria.Firmicutes.C | 3.238588     |          | 0.026029 | Bacteria.Chloroflexi.An   | 0.871814    | -        |          |
| Bacteria.Actinobacte  | 1.774817     | -        |          | Bacteria.Bacteroidetes.E  | 3.247007    | -        |          |
| Bacteria.Proteobacter | 0.778946     | -        |          | Bacteria.Firmicutes.Clos  | 2.471404    | -        |          |
| Bacteria.Proteobacter | 1.497204     | -        |          | Bacteria.Proteobacteria.4 | 1.549827    | -        |          |
| Bacteria.Actinobacte  | 0.657709     | -        |          | Bacteria.Chlamydiae.Ch    | 0.820931    | -        |          |
| Bacteria.Proteobacter | 3.217751     | -        |          | Bacteria.Firmicutes.Clos  | 2.769996    | -        |          |
| Bacteria.Bacteroidete | 1.98963      | -        |          | Bacteria.Verrucomicrob    | 1.087855    | -        |          |
| Bacteria.Actinobacte  | 1.467883     | -        |          | Bacteria.Firmicutes.Bac   | 2.156213    | -        |          |
| Bacteria.Nitrospirae  | 1.6059       | -        |          | Bacteria.Chloroflexi.Chl  | 1.172844    | -        |          |
| Bacteria.Firmicutes.C | 3.415238 WM  | 3.215519 | 0.035514 | Bacteria.Fusobacteria     | 2.522148    | -        |          |
| Bacteria.Bacteroidete | 2.108013     | -        |          | Bacteria.Firmicutes.Clos  | 5.211549    | -        |          |
| Bacteria.Actinobacte  | 4.285852 ND  | 3.985176 | 0.008479 | Bacteria.Firmicutes.Clos  | 2.87065     | -        |          |
| Bacteria.Actinobacte  | 1.897657 CAP | 3.539873 | 0.006776 | Bacteria.Actinobacteria.. | 1.670359    | -        |          |
| Bacteria.Fibrobactere | 0.93928      | -        |          | Bacteria.Proteobacteria.. | 1.172844    | -        |          |

|                        |          |    |          |                            |                            |          |                   |
|------------------------|----------|----|----------|----------------------------|----------------------------|----------|-------------------|
| Bacteria.Proteobacter  | 1.504334 | -  |          | Bacteria.Proteobacteria..  | 1.722299                   | -        |                   |
| Bacteria.Actinobacte   | 0.967542 | -  |          | Bacteria.Proteobacteria.]  | 3.473823                   | WM       | 3.000737 0.014132 |
| Bacteria.Proteobacter  | 0.715946 | -  |          | Bacteria.Bacteroidetes.E   | 2.385627                   |          | -                 |
| Bacteria.Firmicutes.E  | 1.875479 | -  |          | Bacteria.Tenericutes.Mc    | 2.415527                   |          | 0.024104          |
| Bacteria.Firmicutes.E  | 0.778946 | -  |          | Bacteria.Firmicutes.Clos   | 3.338992                   |          | 0.022404          |
| Bacteria._Thermi_.D    | 1.168634 | -  |          | Bacteria.Chloroflexi.An    | 0.887235                   |          | -                 |
| Bacteria.Actinobacte   | 2.082068 | -  |          | Bacteria.Bacteroidetes.F   | 2.000166                   |          | -                 |
| Bacteria.Proteobacter  | 1.31827  | ND | 4.453779 | 0.024104                   | Bacteria.Actinobacteria.   | 4.039904 | -                 |
| Bacteria.Proteobacter  | 1.526656 | -  |          | Bacteria.Tenericutes.Mc    | 2.415527                   |          | 0.024104          |
| Bacteria.Firmicutes.E  | 0.721702 | -  |          | Bacteria.Firmicutes.Clos   | 0.887235                   |          | -                 |
| Bacteria.Proteobacter  | 0.724788 | -  |          | Bacteria.Proteobacteria.() | 1.799437                   |          | -                 |
| Bacteria.Verrucomici   | 4.382082 | -  |          | Bacteria.Actinobacteria.   | 1.110452                   |          | -                 |
| Bacteria.Deferribacte  | 1.583806 | -  |          | Bacteria.Firmicutes.Bac    | 2.400488                   |          | -                 |
| Bacteria.Firmicutes.E  | 2.624963 | -  |          | Bacteria._Thermi_.Dein     | 0.819863                   |          | -                 |
| Bacteria.Proteobacter  | 0.833801 | -  |          | Bacteria.Actinobacteria.   | 2.327576                   |          | -                 |
| Bacteria.Chloroflexi.. | 0.778617 | -  |          | Bacteria.Actinobacteria.   | 1.165392                   |          | -                 |
| Bacteria.Proteobacter  | 1.277842 | -  |          | Bacteria.Proteobacteria.]  | 1.158028                   |          | -                 |
| Bacteria.Bacteroidete  | 1.184478 | -  |          | Bacteria.Firmicutes.Bac    | 1.48784                    |          | -                 |
| Bacteria.Actinobacte   | 5.52973  | ND | 5.172378 | 0.029029                   | Bacteria.Proteobacteria.() | 0.871814 | -                 |
| Bacteria.Bacteroidete  | 2.762246 | -  |          | Bacteria.Verrucomicrob     | 4.718689                   |          | -                 |
| Bacteria.Bacteroidete  | 2.328387 | -  |          | Bacteria.Deferribacteres   | 1.670867                   |          | -                 |
| Bacteria.Proteobacter  | 1.597637 | -  |          | Bacteria.Proteobacteria..  | 1.172844                   |          | -                 |
| Bacteria.Chloroflexi.. | 1.121387 | -  |          | Bacteria.Firmicutes.Bac    | 1.661327                   |          | -                 |
| Bacteria.Proteobacter  | 2.952034 | -  |          | Bacteria.Proteobacteria.() | 2.28772                    |          | -                 |
| Bacteria.Proteobacter  | 1.36916  | -  |          | Bacteria.Proteobacteria.]  | 1.198262                   |          | -                 |
| Bacteria.Proteobacter  | 2.721381 | -  |          | Bacteria.Bacteroidetes.S   | 1.403291                   |          | -                 |
| Bacteria.Firmicutes.C  | 1.604066 | -  |          | Bacteria.Actinobacteria    | 5.015093                   |          | -                 |
| Bacteria.Firmicutes.E  | 1.268572 | -  |          | Bacteria.Bacteroidetes.E   | 4.161718                   |          | -                 |
| Bacteria.Chlorobi.Igr  | 1.711404 | -  |          | Bacteria.Actinobacteria.   | 0.928188                   |          | -                 |
| Bacteria.Bacteroidete  | 1.54134  | -  |          | Bacteria.Proteobacteria.() | 1.543729                   |          | -                 |
| Bacteria.Proteobacter  | 0.767743 | -  |          | Bacteria.Proteobacteria..  | 0.856229                   |          | -                 |
| Bacteria.Chloroflexi.. | 0.752123 | -  |          | Bacteria.Proteobacteria.() | 0.962263                   |          | -                 |
| Bacteria.Actinobacte   | 1.569602 | -  |          | Bacteria.Firmicutes.Bac    | 3.842094                   |          | -                 |

|                        |          |   |                           |             |          |          |
|------------------------|----------|---|---------------------------|-------------|----------|----------|
| Bacteria.Acidobacter   | 0.715946 | - | Bacteria.Proteobacteria.] | 3.797285 ND | 3.483152 | 0.038705 |
| Bacteria.Proteobacteri | 2.131837 | - | Bacteria.Firmicutes.Clos  | 2.120338    | -        |          |
| Bacteria.Bacteroidete  | 2.162223 | - | Bacteria.Bacteroidetes.F  | 1.291347    | -        |          |
| Bacteria.Verrucomici   | 1.003489 | - | Bacteria.Firmicutes.Erys  | 1.534886    | -        |          |
| Bacteria.Proteobacteri | 0.937682 | - | Bacteria.Chlorobi.Ignavi  | 1.478429    | -        |          |
| Bacteria.Bacteroidete  | 1.184478 | - | Bacteria.Deferribacteres  | 1.670867    | -        |          |
| Bacteria               | 6        | - | Bacteria.Proteobacteria.0 | 0.928188    | -        |          |
| Bacteria.Bacteroidete  | 3.114934 | - | Bacteria.Actinobacteria.. | 1.60705     | -        |          |
| Bacteria.Proteobacteri | 1.504334 | - | Bacteria.Proteobacteria.0 | 2.28772     | -        |          |
| Bacteria.Chloroflexi.. | 1.555832 | - | Bacteria.Bacteroidetes.E  | 2.422496    |          | 0.019129 |
|                        |          |   | Bacteria.Proteobacteria.. | 1.135658    | -        |          |
|                        |          |   | Bacteria.Bacteroidetes.S  | 1.403291    | -        |          |
|                        |          |   | Bacteria                  | 6           | -        |          |
|                        |          |   | Bacteria.Bacteroidetes.E  | 3.612911 WM | 3.269031 | 0.032528 |
|                        |          |   | Bacteria.Proteobacteria.0 | 1.799437    | -        |          |
|                        |          |   | Bacteria.Actinobacteria.. | 1.186319    | -        |          |
|                        |          |   | Bacteria.Firmicutes.Bac   | 0.89258     | -        |          |
|                        |          |   | Bacteria.Acidobacteria.i  | 1.057625    | -        |          |
|                        |          |   | Bacteria.Chloroflexi.An   | 1.871682    | -        |          |
